# Quantitation of single action potential-evoked Ca<sup>2+</sup> signals in CA1 pyramidal neuron presynaptic terminals

Emily Church<sup>1,2,3</sup>, Edaeni Hamid<sup>1,3</sup>, and Simon Alford<sup>1,2</sup>

1. Department of Biological Sciences, University of Illinois at Chicago, 840 West Taylor St,  
Chicago IL 60607

2. Department of Anatomy and Cell Biology, University of Illinois at Chicago, 808 South Wood  
St, Chicago IL 60612

3. These authors contributed equally

## Acknowledgements

We would like to thank Drs Janet Richmond and Nelson Spruston for helpful discussions throughout the course of this study. This work was funded by NIH grants R01 MH084874 and R01 NS052699 to SA and F31 NS063662 to EH.

## Abstract

Presynaptic  $\text{Ca}^{2+}$  evokes exocytosis, endocytosis, and short-term synaptic plasticity. However,  $\text{Ca}^{2+}$  flux and interactions at presynaptic molecular targets are difficult to determine, because imaging has limited resolution. We measured single varicosity presynaptic  $\text{Ca}^{2+}$  using  $\text{Ca}^{2+}$  dyes as buffers, and constructed models of  $\text{Ca}^{2+}$  dispersal. Action potentials evoked  $\text{Ca}^{2+}$  transients (peak amplitude,  $789 \pm 39$  nM, within 2 ms of stimulation; decay times,  $119 \pm 10$  ms) with little variation when measured with low-affinity dye. Endogenous  $\text{Ca}^{2+}$  buffering capacities, action potential-evoked free  $[\text{Ca}^{2+}]_i$  and total amounts entering terminals were determined using high-affinity  $\text{Ca}^{2+}$  dyes to buffer  $\text{Ca}^{2+}$  transients. These data constrained Monte Carlo (MCell) simulations of  $\text{Ca}^{2+}$  entry, buffering, and removal. Data were well-fit with simulations of experimentally-determined  $\text{Ca}^{2+}$  fluxes, buffered by simulated Calbindin<sub>28K</sub>. Simulations were consistent with clustered  $\text{Ca}^{2+}$  entry followed within 2 ms by diffusion throughout the varicosity. Repetitive stimulation caused free varicosity  $\text{Ca}^{2+}$  to sum. However, simulated in nanometer domains, its removal by pumps and buffering was negligible, while diffusion rates were high. Thus,  $\text{Ca}^{2+}$  within tens of nanometers of entry, did not accumulate during sequential stimuli. A model of synaptotagmin1- $\text{Ca}^{2+}$  binding indicates that even with 10  $\mu\text{M}$  free varicosity  $\text{Ca}^{2+}$ , synaptotagmin1 must be within tens of nanometers of channels to ensure occupation of all its  $\text{Ca}^{2+}$  binding sites. Repetitive stimulation, which evokes short-term synaptic enhancement, does not modify probabilities of  $\text{Ca}^{2+}$  fully occupying synaptotagmin1's C2 domains, suggesting that enhancement is not mediated by  $\text{Ca}^{2+}$ -synaptotagmin1. We conclude that at spatio-temporal scale of fusion machines,  $\text{Ca}^{2+}$  necessary for their activation is diffusion dominated.

## Introduction

Presynaptic  $[Ca^{2+}]$  entry through voltage-gated  $Ca^{2+}$  channels (VGCCs) causes exocytosis (Katz and Miledi, 1967). Exocytosis may require just one VGCC (Stanley, 1993; Bucurenciu et al., 2010; Weber et al., 2010; Eggermann et al., 2012; Scimemi and Diamond, 2012), or their clustering at microdomains (Llinas et al., 1992; Shahrezaei and Delaney, 2004; Oheim et al., 2006). Additionally,  $Ca^{2+}$  plays other roles in presynaptic terminals including modifying repetitive neurotransmission (Zucker, 1989; Zucker and Regehr, 2002) and receptor-mediated neuromodulation (Yoon et al., 2007; Gerachshenko et al., 2009).

Presynaptic  $Ca^{2+}$  transients are resolvable with  $Ca^{2+}$  dyes (DiGregorio and Vergara, 1997; Cochilla and Alford, 1998; Koester and Sakmann, 2000). However,  $Ca^{2+}$  is utilized too locally and rapidly to be imaged within the dimensions of  $Ca^{2+}$ -binding molecules that cause exocytosis - (Adler et al., 1991; Sabatini and Regehr, 1996). Nevertheless, dyes can quantify presynaptic  $Ca^{2+}$  entry, buffering and removal (Neher and Augustine, 1992; Koester and Sakmann, 2000; Jackson and Redman, 2003; Brenowitz and Regehr, 2007). This approach requires calibration of dye concentrations and  $Ca^{2+}$  binding properties within cells.

CA1 pyramidal neuron somata and dendrites contain approximately 40  $\mu M$  of the  $Ca^{2+}$  binding protein calbindin<sub>28K</sub> (Baimbridge et al., 1992; Müller et al., 2005) which may represent their dominant buffer (Yi, 2013) – although other buffers will have an impact. Indeed, calmodulin is present at presynaptic terminals (Llinas et al., 1991; Hinds et al., 2003). Buffering characteristics of these EF hand proteins have been characterized *in vitro* (Nägerl et al., 2000; Faas and Mody, 2012) and by modeling *in situ* (Schmidt et al., 2005), allowing their impact on local  $Ca^{2+}$  signaling to be modeled.

Synaptotagmin1 is idely considered the principal  $Ca^{2+}$  sensor for evoked release in pyramidal synapses (Geppert et al., 1994). In many synapses, exocytosis requires close association (<100 nm) between  $Ca^{2+}$  entry and synaptotagmin (Adler et al., 1991; Martens et al.,

2007; Chapman, 2008; Südhof and Rizo, 2011).  $\text{Ca}^{2+}$  buffers modify  $\text{Ca}^{2+}$  diffusion, and  $\text{Ca}^{2+}$ -synaptotagmin interactions. Though widely accepted (DiGregorio and Vergara, 1997; Koester and Sakmann, 2000) this is poorly characterized in presynaptic terminals. Synaptotagmin 1 (syt1) has two  $\text{Ca}^{2+}$  binding domains (C2A and C2B) (Perin et al., 1991) which bind 3 and 2  $\text{Ca}^{2+}$  ions and is the  $\text{Ca}^{2+}$  sensor in CA1 axons. However, it is unclear whether all syt1  $\text{Ca}^{2+}$  sites must bind  $\text{Ca}^{2+}$  given very low affinities for the C2B domain. Indeed, only one domain is necessary for membrane interaction (Davletov and Südhof, 1993), although this low affinity increases on association with lipid membranes containing phosphatidylinositol 4,5-bisphosphate  $\text{PI}(4,5)\text{P}_2$  (Radhakrishnan et al., 2009; van den Bogaart et al., 2012). To understand how presynaptic  $\text{Ca}^{2+}$  interacts with synaptotagmin, we have quantified  $[\text{Ca}^{2+}]_i$  in CA1 presynaptic terminals during single action potentials. This allowed us to simulate action-potential-evoked  $\text{Ca}^{2+}$  entry, binding, buffering and dispersal at individual terminals using Monte Carlo simulation (MCell (Kerr et al., 2008) and investigate its interaction with syt1 at resolutions that evoke exocytosis.

## Results

### *Loading cells and resting $\text{Ca}^{2+}$ concentrations in axonal varicosities*

To measure presynaptic  $\text{Ca}^{2+}$ , dye was introduced to CA1 pyramidal neurons from somatic whole cell pipettes containing  $\text{Ca}^{2+}$ -sensitive dye (Fig 1B), and Alexa 594 hydrazide (250  $\mu\text{M}$ ; Fig 1A). After 20 mins, the axon was traced by imaging Alexa 594 (Hamid et al., 2014). We initially used Fluo-4 (1mM) as a  $\text{Ca}^{2+}$  sensor. Both dyes diffused into axon varicosities at similar rates (Fig 1C) and Alexa 594 fluorescence was used to measure dye concentration. We assume co-diffusion of the dyes which have similar molecular weights (736 and 737  $\text{g}\cdot\text{mol}^{-1}$ ). Thus, dye concentrations were calculated throughout each experiment (methods). MCell simulations of diffusion from these molecular weights and the axon

morphology support this assumption (Supplemental Fig 1). To illustrate this, Alexa 594 hydrazide and Fluo-4 fluorescence (Fig 2Aa) were normalized to their values when the first varicosity image (inset 1) was obtained. For 70 mins (until Fig 2Aa inset 2), fluorescence ratios between the dyes remained constant. Resting  $[Ca^{2+}]_i$  was calculated from these data and the  $F_{max}$  of Fluo-4 fluorescence (obtained by repetitive stimulation), applied to equation 3 (methods).  $[Ca^{2+}]_i$  remained stable for >1 hour as dye concentrations rose (Fig 2Ab; mean resting  $[Ca^{2+}]_i = 81 \pm 5$  nM; 11 cells). At 80 mins, Fluo-4 fluorescence increased more rapidly than Alexa 594's revealing an increase in resting  $[Ca^{2+}]_i$  (Fig 2Aa, green circles). No data were used after this.

#### *Dependency of the $Ca^{2+}$ signal on dye buffering capacity ( $\kappa_{dye}$ )*

Single CA1 axon varicosities loaded with high-affinity  $Ca^{2+}$ -sensitive dye (Fluo-4,  $K_d$ ,  $0.44 \mu M$ ;  $1$  mM) were imaged by line-scanning single action potential evoked  $Ca^{2+}$  transients (Fig 2B). Transient peak amplitudes reduced, and decay time constants ( $\tau$ ) increased as dye concentrations rose (Fig 2B). This is consistent with  $Ca^{2+}$  buffering by Fluo-4, because the amplitude represents a proportion of the dye that is  $Ca^{2+}$ -bound. As dye concentrations rise a smaller dye fraction binds  $Ca^{2+}$  entering. Unbound dye competes for  $Ca^{2+}$  with endogenous buffers, consequently,  $\tau$  increases as rebinding to dye becomes more likely in cells (Neher and Augustine, 1992) or nerve terminals (Koester and Sakmann, 2000; Jackson and Redman, 2003; Brenowitz and Regehr, 2007). An alternative explanation for increased  $\tau$  is diffusional loss of endogenous buffers during whole cell recording (Müller et al., 2007). However, this would occur regardless of dye concentration or affinity, be dependent on recording duration, and accompanied by increased peak amplitudes. These did not occur (supplemental Fig 2).

Similar experiments were performed substituting a low affinity  $Ca^{2+}$  dye ( $200 \mu M$  Fluo-5F,  $k_d$   $1.49 \mu M$ ;  $n = 30$ ). Responses were recorded during rising dye concentrations (Fig 2Ca-b). Normalized as  $(\Delta F/F+1)$ , these  $Ca^{2+}$  transients were invariant in amplitude and  $\tau$  throughout the

experiment (Fig. 2Cd), and the fluorescence transient was uniform across the varicosity within 6 ms of the stimulus (Fig 2Ce). Means of transients from sequential stimuli were plotted, and single exponentials fit to decays (Fig 2Cf). In all cells, transients from different varicosities at different axon locations gave reproducible amplitudes and  $\tau$ 's (mean  $\Delta[\text{Ca}^{2+}]_i = 677 \pm 10$  nM (methods, equation 3), mean  $\tau = 119 \pm 1.4$  ms,  $n = 30$ ).

Comparing  $\text{Ca}^{2+}$  transient  $\tau$ 's and amplitudes from Fluo-4 ( $n=11$ ) vs. Fluo-5F ( $n = 7$ ) at similar times after whole-cell access also indicates dye buffering (increasing  $\kappa_{\text{dye}}$ ) not loss of endogenous buffer causes the changes in peak  $\Delta F/F$  and  $\tau$ . Using Fluo-4, as concentration increased,  $\tau$  increased and peak amplitudes were reduced. However, Fluo-5F left both unaltered (Supplementary Fig 2). Calculated dye concentrations were therefore used to relate dye buffering to varicosity  $\text{Ca}^{2+}$  transients (example cell, Fig 3: Supplementary materials).

We determined  $\kappa_{\text{dye}}$  (equation 4) for each  $\text{Ca}^{2+}$  transient from varicosity dye concentrations, changes in varicosity free  $\text{Ca}^{2+}$  ( $\Delta[\text{Ca}^{2+}]_i$ ) calculated from this data, and equation (3). In 18 neurons (7 - Fluo-5F, 11 - Fluo-4) a linear fit to  $\tau$  vs  $\kappa_{\text{dye}}$  (Fig 3A) gave an x intercept of  $-58 \pm 40$  and an estimate of the endogenous buffering capacity of the varicosity ( $\kappa_{\text{end}}$ ) of 57 (equation 5). A plot of  $\Delta[\text{Ca}^{2+}]_i$  (equation 3) against  $\kappa_{\text{dye}}$  (Fig 3B) demonstrated the relationship between  $\kappa_{\text{dye}}$  and the  $\text{Ca}^{2+}$  transient. A fit of equation (9) to this data or a linear fit to  $1/\Delta[\text{Ca}^{2+}]_i$  vs  $\kappa_{\text{dye}}$  (inset Fig 3B) gives a peak free  $\text{Ca}^{2+}$  concentration ( $[\text{Ca}^{2+}]_i$ ) in the absence of dye throughout the terminal of  $0.76 \pm 0.03$   $\mu\text{M}$ . This is obtained from the y-axis intercept of the fit where  $\kappa_{\text{dye}} = 0$ . Constants from the same fit give total  $\text{Ca}^{2+}$  entry of  $58 \pm 6$   $\mu\text{M}$  and  $\kappa_{\text{end}}$  of  $75 \pm 6$ .

Total dye bound  $\text{Ca}^{2+}$  ( $[\text{Ca}_{\text{dye}}]$ ) was calculated for each transient either from the product of  $[\text{Ca}^{2+}]_i$  and  $\kappa_{\text{dye}}$ , or from proportions of dye bound to  $\text{Ca}^{2+}$  calculated from the Hill equation. These gave values that differed by less than 5%. Data in Fig 3C are from the former. If total  $\text{Ca}^{2+}$  entering each varicosity were constant for each action potential, then these data are

represented by equation (10), in which the asymptotic value of total  $\text{Ca}^{2+}$  entering the varicosity was  $45 \pm 3 \mu\text{M}$ . From this and each measured varicosity dimensions (volume mean =  $1.7 \pm 0.3 \mu\text{m}^3$ , median =  $1.2 \mu\text{m}^3$ ,  $n=18$ ) we determined total molar  $\text{Ca}^{2+}$  entering the varicosity (Table 1).  $\kappa_{\text{end}}$  is taken from fits of equation (9) to  $\Delta[\text{Ca}^{2+}]_i$  (Fig 3B). Peak  $[\text{Ca}^{2+}]_i$  is for  $\text{Ca}^{2+}$  throughout the varicosity and total  $[\text{Ca}^{2+}]$  entering is from fits to equation (10) of data in figure 3C. Results with least errors were used and summarized in table 1.

#### *Ca<sup>2+</sup> source and removal from the terminal*

Internal stores might contribute to  $\text{Ca}^{2+}$  transients (Cochilla and Alford, 1998; Emptage et al., 2001; Scott and Rusakov, 2008). Calculations of  $\text{Ca}^{2+}$  entering, and  $\kappa_{\text{end}}$  will be distorted if secondary  $\text{Ca}^{2+}$  sources exist. In recordings with Fluo-5F, ryanodine ( $5 \mu\text{M}$ ; to block store release) was superfused, and five action potentials (50 Hz; Fig. 4A) evoked a response on which ryanodine had no effect (to  $111 \pm 12\%$  of control, 95% confidence interval of 90 to 132 %,  $n=5$ ). Thus ryanodine does not meaningfully alter  $\text{Ca}^{2+}$  transients.

If  $\text{Ca}^{2+}$  extrusion is mediated by pumps with linear rates vs peak  $[\text{Ca}^{2+}]_i$ , then as the transient varies with  $\kappa_{\text{dye}}$ , removal rates can be calculated. As dye concentration increases,  $\kappa_{\text{dye}}$  dominates  $\kappa_{\text{end}}$ , and peak  $[\text{Ca}^{2+}]_i$  available to pumps is reduced. Removal will be inversely proportional to available  $[\text{Ca}^{2+}]_i$ . The slope of  $1/\tau$  of the transient against peak  $[\text{Ca}^{2+}]_i$  allows calculation of  $\text{Ca}^{2+}$  removal. Thus, these data obtained with Fluo-4 were plotted (Fig. 4B) and the extrusion rate ( $7.6 \times 10^6 \times (\text{total } \#\text{Ca}^{2+} \text{ ions}) \text{ M}^{-1} \cdot \text{s}^{-1}$ ) calculated from the slope. The linearity of these data also provide evidence that secondary  $\text{Ca}^{2+}$  sources do not contribute to the transient, at least at these values of  $\kappa_{\text{dye}}$ . A summary of experimentally determined properties of the varicosity is given (Table 1).

**Table 1, parameters of the varicosity and  $\text{Ca}^{2+}$  signaling**

|                       |             |
|-----------------------|-------------|
| $\kappa_{\text{end}}$ | $75 \pm 10$ |
|-----------------------|-------------|

|                                                             |                                                                                                         |
|-------------------------------------------------------------|---------------------------------------------------------------------------------------------------------|
| Resting $[Ca^{2+}]$ (nM)                                    | $81 \pm 5$                                                                                              |
| Peak $\Delta[Ca^{2+}]_i$ (nM)                               | $760 \pm 30$                                                                                            |
| Total calcium entering ( $\Delta[Ca]_{total}$ ) ( $\mu M$ ) | $45 \pm 3$                                                                                              |
| Total Molar $Ca^{2+}$ entry (mol)                           | $8.0 \times 10^{-20}$                                                                                   |
| Median varicosity volume ( $\mu m^3$ )                      | $1.2 \pm 0.3$                                                                                           |
| Mean varicosity surface area ( $\mu m^2$ )                  | $7.6 \pm 1.0$                                                                                           |
| Fluo-5F transient decay rate $\tau$ (ms)                    | $119.5 \pm 1.4$                                                                                         |
| Calculated $\tau$ with 0 [dye]                              | $0.11 \pm 0.09$                                                                                         |
| Extrusion pump rate                                         | $7.6 \times 10^6 \pm 1.1 \times 10^6 \times (\text{total } \#Ca^{2+} \text{ ions}) M^{-1} \cdot s^{-1}$ |

### *Modelling of $Ca^{2+}$ transients in varicosities*

Imaging experiments provided resting  $[Ca^{2+}]_i$ , varicosity volumes, their endogenous buffering capacity, the peak free  $[Ca^{2+}]_i$ , the total  $Ca^{2+}$  entering, and its removal rate. The principal  $Ca^{2+}$  buffer in CA1 pyramidal somata is calbindin<sub>28k</sub> (Müller et al., 2005) ( $40 \mu M$ ), making it a candidate buffer in varicosities (Arszovszki et al., 2014) with well-characterised  $Ca^{2+}$  binding properties (Nägerl et al., 2000). Calmodulin with similarly characterized properties (Faas et al., 2011) has also been proposed as a dominant binding protein in these neurons. We constructed a 3D model in the simulation environment MCell (see methods) (Kerr et al., 2008), to investigate  $Ca^{2+}$  entry, diffusion, buffering, and removal during action potential stimulation. Parameters and buffers (either calbindin<sub>28k</sub> or calmodulin), used in this model were determined in this study, obtained from the literature, or varied to obtain best fits to the data (Table 2).

**Table 2. parameters used in the MCell model**

| Parameter                                                     | Value | Source of Value     |
|---------------------------------------------------------------|-------|---------------------|
| Resting free $[Ca^{2+}]_i$ (nM)                               | 81    | Equation 3          |
| Peak free $\Delta[Ca^{2+}]_i$ (nM)                            | 760   | Equation 9, Fig 3B  |
| Total [calcium] entering ( $\Delta[Ca]_{total}$ ) ( $\mu M$ ) | 45    | Equation 10, Fig 3C |



|                                                                                                                                                                                                                                                                   |                                                                                                                                                                                                                                                                                                                                                                                  |                                                                                                                                                                                   |
|-------------------------------------------------------------------------------------------------------------------------------------------------------------------------------------------------------------------------------------------------------------------|----------------------------------------------------------------------------------------------------------------------------------------------------------------------------------------------------------------------------------------------------------------------------------------------------------------------------------------------------------------------------------|-----------------------------------------------------------------------------------------------------------------------------------------------------------------------------------|
| Absolute extrusion rate<br>Leak intrusion rate                                                                                                                                                                                                                    | $2.2 \times 10^{11} \text{ M}^{-1} \cdot \text{s}^{-1}$<br>$1.77 \times 10^5 \text{ s}^{-1}$                                                                                                                                                                                                                                                                                     | Fig 4B x total # $\text{Ca}^{2+}$ ions<br>for resting $[\text{Ca}^{2+}]_i = 81 \text{ nM}$                                                                                        |
| Decay rate at 0 [dye] ( $\tau$ )                                                                                                                                                                                                                                  | 0.110 s                                                                                                                                                                                                                                                                                                                                                                          | Fig 3A                                                                                                                                                                            |
| Volume of model terminal (L)<br>Cytosolic volume (L)                                                                                                                                                                                                              | $1.22 \times 10^{-11}$<br>$1.07 \times 10^{-11}$                                                                                                                                                                                                                                                                                                                                 | Cytosolic volume excludes<br>organelle and vesicle<br>structures in the model                                                                                                     |
| <b>Dye parameters</b>                                                                                                                                                                                                                                             |                                                                                                                                                                                                                                                                                                                                                                                  |                                                                                                                                                                                   |
| Fluo-4 $K_d / k_{on} / k_{off}$<br>$F_{min}/F_{max}$                                                                                                                                                                                                              | $0.44 \mu\text{M} / 5 \times 10^8 \text{ M}^{-1} \cdot \text{s}^{-1} / 221.5 \text{ s}^{-1} / 750 \text{ s}^{-1}$<br>0.0232                                                                                                                                                                                                                                                      | Fig 1                                                                                                                                                                             |
| Fluo-5F $K_d / k_{on} / k_{off}$                                                                                                                                                                                                                                  | $1.49 \mu\text{M} / 5 \times 10^8 \text{ M}^{-1} \cdot \text{s}^{-1} / 750 \text{ s}^{-1}$                                                                                                                                                                                                                                                                                       | Fig 1                                                                                                                                                                             |
| <b>Calcium Buffers</b>                                                                                                                                                                                                                                            |                                                                                                                                                                                                                                                                                                                                                                                  |                                                                                                                                                                                   |
| <b>Calbindin28K</b> Concentration<br>Ratio of high to low affinity sites<br>3:1 ratio high affinity $k_{on} / k_{off}$<br>3:1 ratio medium affinity $k_{on} / k_{off}$<br>2:2 ratio high affinity $k_{on} / k_{off}$<br>2:2 ratio low affinity $k_{on} / k_{off}$ | 15 – 60 $\mu\text{M}$<br>2:2 or 1:3<br>$6.5 \times 10^6 \text{ M}^{-1} \cdot \text{s}^{-1} / 2.405 \text{ s}^{-1}$<br>$3.85 \times 10^7 \text{ M}^{-1} \cdot \text{s}^{-1} / 44.44 \text{ s}^{-1}$<br>$5.5 \times 10^6 \text{ M}^{-1} \cdot \text{s}^{-1} / 2.6 \text{ s}^{-1}$<br>$4.35 \times 10^7 \text{ M}^{-1} \cdot \text{s}^{-1} / 35.8 \text{ s}^{-1}$                   | Varied in model<br>Varied in model (Nägerl et<br>al., 2000; Schmidt et al.,<br>2012)                                                                                              |
| <b>Calmodulin</b> Concentration<br>N terminal $k_{on/off}$ T<br>N terminal $k_{on/off}$ R<br>C terminal $k_{on/off}$ T<br>C terminal $k_{on/off}$ R                                                                                                               | 15 – 60 $\mu\text{M}$<br>$7.7 \times 10^8 \text{ M}^{-1} \cdot \text{s}^{-1} / 1.6 \times 10^5 \text{ s}^{-1}$<br>$3.2 \times 10^{10} \text{ M}^{-1} \cdot \text{s}^{-1} / 2.2 \times 10^4 \text{ s}^{-1}$<br>$8.4 \times 10^7 \text{ M}^{-1} \cdot \text{s}^{-1} / 2.6 \times 10^3 \text{ s}^{-1}$<br>$2.5 \times 10^7 \text{ M}^{-1} \cdot \text{s}^{-1} / 6.5 \text{ s}^{-1}$ | Varied in model<br>Faas et al.(Faas et al.,<br>2011) (Stoichiometry is<br>present with each EF hand<br>lobe showing two<br>sequential on and off rates<br>represented by T and R) |
| <b>Synaptotagmin 1 C2A</b> $k_{on}/k_{off}$                                                                                                                                                                                                                       | $2 \times 10^8 \text{ M}^{-1} \cdot \text{s}^{-1} / 1.2 \times 10^4 \text{ s}^{-1}$<br>$2 \times 10^8 \text{ M}^{-1} \cdot \text{s}^{-1} / 8 \times 10^3 \text{ s}^{-1}$                                                                                                                                                                                                         | (Radhakrishnan et al.,<br>2009)                                                                                                                                                   |
| <b>Synaptotagmin 1 C2B</b> $k_{on}/k_{off}$                                                                                                                                                                                                                       | $2 \times 10^8 \text{ M}^{-1} \cdot \text{s}^{-1} / 2 \times 10^5 \text{ s}^{-1}$<br>$2 \times 10^8 \text{ M}^{-1} \cdot \text{s}^{-1} / 4 \times 10^4 \text{ s}^{-1}$<br>$2 \times 10^8 \text{ M}^{-1} \cdot \text{s}^{-1} / 4 \times 10^4 \text{ s}^{-1}$                                                                                                                      |                                                                                                                                                                                   |
| <b>Diffusion constants</b>                                                                                                                                                                                                                                        |                                                                                                                                                                                                                                                                                                                                                                                  |                                                                                                                                                                                   |
| $D_{\text{Ca}}$                                                                                                                                                                                                                                                   | $223 \mu\text{m}^2 \cdot \text{s}^{-1}$                                                                                                                                                                                                                                                                                                                                          | (Allbritton et al., 1992)                                                                                                                                                         |
| $D_{\text{Fluo-4}}$                                                                                                                                                                                                                                               | $75 \mu\text{m}^2 \cdot \text{s}^{-1}$                                                                                                                                                                                                                                                                                                                                           | (Kong et al., 2013)                                                                                                                                                               |
| $D_{\text{Fluo-5F}}$                                                                                                                                                                                                                                              | $75 \mu\text{m}^2 \cdot \text{s}^{-1}$                                                                                                                                                                                                                                                                                                                                           | (Kong et al., 2013)                                                                                                                                                               |
| $D_{\text{Calbindin}}$                                                                                                                                                                                                                                            | 0.2 fraction immobile                                                                                                                                                                                                                                                                                                                                                            | (Schmidt et al., 2012)                                                                                                                                                            |
|                                                                                                                                                                                                                                                                   | 0.8 fraction mobile, $20 \mu\text{m}^2 \cdot \text{s}^{-1}$                                                                                                                                                                                                                                                                                                                      | (Schmidt et al., 2012)                                                                                                                                                            |

A 3D mesh model was developed (Blender), from published data and from this study.

Varicosities were represented by ellipsoids, 2 by 1  $\mu\text{m}$  (volume =  $1.2 \times 10^{-11} \text{ L}$ , the median measured varicosity volume) *en-passant* to an axon (0.12  $\mu\text{m}$  diameter). They contained 320 40 nm diameter vesicles and an internal structure mimicking organelles to position 1/3 of the  $\text{Ca}^{2+}$  extrusion pumps (Fig 5A; supplementary video 1 for  $\text{Ca}^{2+}$  transient simulation). We modeled

Ca<sup>2+</sup> extrusion with a rate of  $2.2 \times 10^{11} \text{ M}^{-1} \cdot \text{s}^{-1}$  distributed to 3000 pumps over the plasma membrane and organelle meshes. A Ca<sup>2+</sup> leak ( $1.77 \times 10^5 \text{ s}^{-1}$ ) similarly distributed achieved resting free  $[\text{Ca}^{2+}]_i$  of 81 nM. Ca<sup>2+</sup> buffering was modeled with three models of buffers (calbindin<sub>28K</sub> 3:1 ratio, calbindin<sub>28K</sub> 2:2 ratio or calmodulin). Calbindin<sub>28K</sub> possesses four Ca<sup>2+</sup> binding sites and models have been proposed for its Ca<sup>2+</sup> binding (Nägerl et al., 2000) with 3:1 or 2:2 ratios of high and medium affinity non-cooperative sites. The former model was slightly but not significantly favored in data fits *in vitro* (Nägerl et al., 2000), but the latter significantly in a model of cerebellar Purkinje neurons (Schmidt et al., 2012) in which a correction to the on-rate accounted for intracellular Mg<sup>2+</sup>. Ca<sup>2+</sup>-calmodulin binding was also modeled using published parameters (Faas et al., 2011) (table 2). We utilized the same Mg<sup>2+</sup> on-rate correction in our models for calbindin<sub>28K</sub> and calmodulin. Evoked Ca<sup>2+</sup> entry was modeled as a total of 45 μM Ca<sup>2+</sup> entering the terminal in 2 ms (table 1)

Buffer concentrations were first estimated by solving the Hill equation for values of total Ca<sup>2+</sup> entry, and resting, and stimulated peak free  $[\text{Ca}^{2+}]_i$ . This assumes equilibrium at peak, and was expected to underestimate true buffer concentrations because Ca<sup>2+</sup> transients are too rapid for equilibration. This gave 92.8 μM for calmodulin and 24.8 μM calbindin<sub>28K</sub> (2:2 ratio of high and medium affinity sites), or 19.7 μM (3:1 ratio).

To determine buffer parameters, simulated endogenous buffer concentrations were varied starting at steady-state results to compare simulations to experimentally determined peak free  $\Delta[\text{Ca}^{2+}]_i$  and  $\tau$  - (Fig 5B; parameters - Tables 2,3). Transient decays were fit with single exponentials omitting the first 4 ms of the simulation to avoid initial Ca<sup>2+</sup> inhomogeneities. From these fits, peak free  $\Delta[\text{Ca}^{2+}]_i$  and  $\tau$  were plotted against simulated buffer concentrations (Fig. 5C). Intersection of simulated and experimental values for  $\tau$  and  $\Delta[\text{Ca}^{2+}]_i$  implies that model parameters are accurate and provides an estimate for buffer concentration and type. Models of

calbindin<sub>28K</sub> with a 2:2 binding ratio converge to within the 95% confidence interval of the experimental data (Fig. 5C). A least squares fit for this convergence predicts a calbindin<sub>28K</sub> 2:2 concentration of 39.7  $\mu\text{M}$  – in close agreement to 40-45  $\mu\text{M}$  calbindin<sub>28K</sub> obtained experimentally for rat CA1 pyramidal neuron somata (Müller et al., 2005). Neither the calbindin<sub>28K</sub> 3:1 ratio nor calmodulin converged (Fig 5C, supplementary Fig 4). Note, in cerebellar purkinje neurons, models for calbindin<sub>28K</sub> also favor 2:2 ratios (Schmidt et al., 2012). While other  $\text{Ca}^{2+}$  buffers are present, we conclude that simulating calbindin<sub>28K</sub> with a 2:2 ratio of binding site has validity.

**Table 3 – MCell model specific parameters.**

|                                                                                                                               |                                                                                                                          |
|-------------------------------------------------------------------------------------------------------------------------------|--------------------------------------------------------------------------------------------------------------------------|
| Iteration interval (s)                                                                                                        | $4 \times 10^{-8}$ (calbindin/calmodulin buffer determination).<br>$5 \times 10^{-9}$ (syt1 and local $\text{Ca}^{2+}$ ) |
| Partition size ( $\mu\text{m}$ ) (this is an MCell function that divides the volume into subvolumes to optimize calculations) | 0.2                                                                                                                      |
| Molecular interaction radius (nm) (radius at which two molecules may interact)                                                | 10                                                                                                                       |
| Microscopic reversibility (function that increase accuracy of reactions)                                                      | on                                                                                                                       |

*Model validation of experimental results in a small terminal*

We used simulations to determine if our experimental approach is valid for small terminals. Effects of Fluo-4 (0 to 670  $\mu\text{M}$ ) were simulated and  $\kappa_{\text{dye}}$  calculated as for experimental data. As for experimental data, rising values of simulated  $\kappa_{\text{dye}}$  reduced peak  $[\text{Ca}^{2+}]_i$  and increased  $\tau$ . Peak  $[\text{Ca}^{2+}]_i$  and  $\tau$  were measured from single exponentials fitted to simulated data (Fig. 5Da) omitting the initial 4 ms. Results were plotted with experimental data as  $\tau$  vs.  $\kappa_{\text{dye}}$  (Fig. 5Db), peak  $[\text{Ca}^{2+}]_i$  vs.  $\kappa_{\text{dye}}$  (Fig. 5Dc), and total  $\text{Ca}^{2+}$  entry captured by the dye vs  $\kappa_{\text{dye}}$  (Fig. 5Dd). In all cases simulations fell within the 90% confidence limits of experimental data supporting the use of this approach in small varicosities.

We then compared experimental Fluo-5F results to simulations of Fluo-5F-Ca<sup>2+</sup> binding to validate simulations with experimental data. The simulation reproduced experimental measurements showing that Ca<sup>2+</sup> transients remain isolated to varicosities (supplemental Fig 5A,B). Additionally, simulated responses to repetitive stimulation fell within the 90% confidence interval of the experimental data to equivalent stimuli (supplementary Fig 5C).

### *Spatio-temporal distribution of Ca<sup>2+</sup> entry to the terminal*

Calculations of varicosity [Ca<sup>2+</sup>] and its buffering assume that Ca<sup>2+</sup> rapidly reaches spatial uniformity within varicosities. The overlap between single exponential fits to experimental data and fits to simulations indicate this approach is valid to calculate total Ca<sup>2+</sup> entry and its buffering. However, in five neurons recorded with sufficiently high-resolution, we observed repeatable, but non-uniform Ca<sup>2+</sup> distributions immediately after stimulation (Fig 6).

In each varicosity (Fig. 6A), line-scans (mean of 4 transients in each of the 5 terminals;  $\Delta F/F+1$  vs time; Fig. 6B), reveal brighter regions immediately post-stimulus (Fig. 6Ca, hotspots arrowed at faster timebase - lower panel). However, these spots are close to the resolution limit, and their intensity might be affected by errors in background or prestimulus intensity. If hotspots represent localized Ca<sup>2+</sup> entry then a faster local decay would represent diffusion from this site (mean  $\tau$  overall =  $119.5 \pm 1.4$  ms). Therefore,  $\tau$  was analyzed in line-scan subregions. In the case illustrated, a single exponential well-fit Ca<sup>2+</sup> transients away from hotspots (Fig 6Cb,e; sum of squares of residuals were not significantly different between single and double exponential fits,  $p = 0.11$ ) but did not adequately fit regions at hotspots. These were well-fit by double exponentials ( $\tau$ 's of 6 - 11 and 105 - 135 ms, Fig 6Cc,d). Similar results were obtained in all 5 neurons (mean  $\tau_1 = 9.0 \pm 2.9$  ms;  $\tau_2 = 124.5 \pm 19.1$  ms; ; sum of squares of residuals were significantly different between single and double exponential fits at these hotspots,  $p = 0.013$ ). To illustrate the peak [Ca<sup>2+</sup>]<sub>i</sub> recorded by Fluo-5F, experimental data is replotted (Fig. 6D, black)

as  $[Ca^{2+}]_i$  vs. time, and is well-fit with a double exponential (red; residual above also in red, fast  $\tau = 2.1$  ms, peak  $[Ca^{2+}]_i$  of  $1.8 \mu M$ ; vs.  $0.8 \mu M$  for the rest of the varicosity). In all 5 neurons the mean peak free  $[Ca^{2+}]_i = 2.7 \pm 0.57 \mu M$  and mean fast  $\tau = 3.3 \pm 1.3$  ms. By comparison, the data was poorly fit by a single exponential (blue, residual above, goodness of fit was again determined by comparing sums of squares of residuals. These were significantly different between single and double exponential fits at hotspots;  $p = 0.02$ , but not away from hotspots,  $p = 0.06$ ).

These  $Ca^{2+}$  hotspots are repeatable. Examples from two locations (arrowed Fig 6C) with an early fast  $Ca^{2+}$  transient (Fig 6Ea) or lacking one (Fig 6Eb) were analyzed in 4 sequential stimuli (5 cells). Each response was fit with a double exponential. Fast exponential amplitudes for the two regions were significantly different ( $p = 0.0052$ , two factor ANOVA), but there was no significant difference between slower exponential amplitudes ( $p = 0.08$ ).

We determined whether discrete placement of  $Ca^{2+}$  entry within the simulation could reproduce the experimental  $Ca^{2+}$  distribution. In simulations,  $Ca^{2+}$  entry was located at 1 to 6 plasma membrane sites. Experimental line-scanning was simulated (20 random seeds) by simulating values of Fluo-5F  $\Delta F/F+1$  (Fig 7A) in a line of discrete volumes across the model varicosity (Fig. 7B, vertical yellow band). One end of this band always included only one  $Ca^{2+}$  entry site.  $\Delta F/F+1$  values, were resampled to rates obtained during experimental line scanning (500 Hz) to create a simulated line-scan matrix (Fig 7A) equivalent to the experimental data.

Simulation results were plotted from the two ends of the yellow band, obtained when all  $Ca^{2+}$  entry ( $45 \mu M$ ) was at one point (Fig 7B, top – point of simulated  $Ca^{2+}$  entry, bottom – away from  $Ca^{2+}$  entry) (Fig 7C, overlaid with experimental data, blue). There is a substantial difference between amplitudes of the earliest peak at the  $Ca^{2+}$  entry site (7Ca, red) compared to the other side of the simulated varicosity (Fig 7Cb, black). Similar simulation results were plotted where

Ca<sup>2+</sup> was evenly distributed at 6 locations, one of which was at the same location as above. Little difference in peak amplitude was seen at the Ca<sup>2+</sup> entry site and away from it (Fig 7D).

Double exponentials were fit to the simulations.  $\tau$ 's of fast exponentials were within the 95% confidence limits of fits of early components of experimental data (simulations from 3-4 ms; experimental data, Fig 6D,  $3.3 \pm 1.3$  ms). Peak amplitudes of simulated Fluo-5F  $\Delta F/F$  early components were obtained for fits to all distributions of Ca<sup>2+</sup> entry at the site of entry and across the varicosity at the opposite end of the yellow band (Fig 7B) from this site. Substantial differences in peak amplitudes at a point of Ca<sup>2+</sup> entry compared to the opposite side of the varicosity away from Ca<sup>2+</sup> entry, were observed only when Ca<sup>2+</sup> entry was at one or two sites (that is when at least 50% of total varicosity Ca<sup>2+</sup> entry was localized to one site, Fig 7E). Thus, to obtain experimental local peaks in Ca<sup>2+</sup> (Fig 7), clustering of VGCCs may occur.

#### *Proximity of the point of Ca<sup>2+</sup> entry to the release machinery and Paired-Pulse Facilitation*

Proximity of Ca<sup>2+</sup> entry to its molecular targets can be estimated by comparing effects of BAPTA (rapidly binds Ca<sup>2+</sup>) to EGTA (slower binding) (Adler et al., 1991). To record synaptic responses from CA1 synapses, their axons were stimulated (1/15 Hz) (Hamid et al., 2014). Whole-cell recordings were made from subicular pyramidal neurons and excitatory postsynaptic currents (EPSCs) recorded (in bicuculline, 5  $\mu$ M; AP5, 50  $\mu$ M) to isolate AMPA receptor responses. BAPTA-AM was superfused (10-100  $\mu$ M, 20 mins) and reduced EPSCs dose-dependently (to  $35 \pm 13$  %, 100  $\mu$ M, n = 4; to 38 and 49%, 20  $\mu$ M and to  $80 \pm 10$  % of control, 10  $\mu$ M, n = 3; Fig 8A). In contrast EGTA-AM (20 – 100  $\mu$ M was ineffective (100  $\mu$ M, n = 2, to 91 and 101%; 20  $\mu$ M, n = 7 to  $110 \pm 30$ % of control, p = 0.86, Fig 8C). These results imply a close spatial association between VGCCs and syt1 responsible for exocytosis.

Repetitive stimulation may evoke Ca<sup>2+</sup>-dependent facilitation (Zucker and Regehr, 2002) caused by residual Ca<sup>2+</sup>, Ca<sup>2+</sup>-buffer saturation (Klingauf and Neher, 1997; Matveev et al.,

2004), or  $\text{Ca}^{2+}$ -dependent processes distinct from the exocytic machinery (Fioravante and Regehr, 2011). We determined time-courses of paired-pulse facilitation with EPSCs in subicular pyramidal neurons (Fig 8B;  $n=7$ ). Intervals at 100 ms gave a mean facilitation ratio of  $1.85 \pm 0.191$  (pulse 2/pulse 1,  $n=5$ ,  $p = 0.014$ , Fig 8Ca) which was abolished by EGTA-AM (20  $\mu\text{M}$ ; ratio after EGTA-AM =  $1.0 \pm 0.1$ ,  $p = 0.001$ ). In three of these cells the paired-pulse interval was varied (20 to 500 ms, Fig 8B, C,D). In EGTA, facilitation was abolished at intervals  $>50$  ms. Facilitation ratios from controls ( $n = 7$ ) and after EGTA ( $n = 3$ ) were plotted from 20 to 1000 ms intervals ( $\sim$ duration of varicosity  $\text{Ca}^{2+}$  transients). The effect of paired-pulse stimulation on  $\text{Ca}^{2+}$  transients was measured at 20 and 200 ms intervals. Amplitudes of the paired evoked  $\text{Ca}^{2+}$  transients ( $\Delta[\text{Ca}^{2+}]_i$ ) was not significantly altered ( $n = 5$  and  $3$ , Fig 8E;  $p = 0.25$  at 20 ms). Thus, paired pulse facilitation is  $\text{Ca}^{2+}$ -dependent, but  $\text{Ca}^{2+}$  transients do not measurably summate.

#### *Simulating Paired-Pulse Presynaptic $\text{Ca}^{2+}$ transients*

To address experimental limitations of analyzing  $\text{Ca}^{2+}$  at the spatio-temporal resolutions of the vesicle fusion machinery, we simulated  $\text{Ca}^{2+}$ ,  $\text{Ca}^{2+}$  buffer states, and effects of repetitive stimulation on free  $\text{Ca}^{2+}$  using parameters previously determined (Fig 9; in Supplementary video 2). Within the simulation, at rest,  $>90\%$  of calbindin<sub>28k</sub> is unbound. Stimulation causes partial occupancy of all calbindin<sub>28k</sub> states (Fig 9A). However,  $2/3$  of all bound states remain unoccupied even at peak (Fig 9B, Supplementary Fig 6 shows all calbindin<sub>28k</sub> states). Nevertheless, unbinding is slow and full recovery takes longer than 1 s. We then determined the effect of paired pulses over intervals from 20 to 1000 ms. Though calbindin<sub>28k</sub> was not saturated at all intervals (Fig 9B), the second pulse achieved higher peak free  $[\text{Ca}^{2+}]$  than the first (Fig 9C, difference between 2<sup>nd</sup> peaks, black, and red dashed line). This is in spite of the fact that the  $\text{Ca}^{2+}$  signal recorded at the base of this initial transient resolvable with imaging is only enhanced

by  $<200$  nm and only at the very shortest intervals (summation of the component resolvable by experimental imaging is shown by the blue dashed line).

*Activation of synaptotagmin 1 by evoked presynaptic  $Ca^{2+}$  entry.*

Synaptotagmin 1 (syt1), the  $Ca^{2+}$  sensor for exocytosis, has two C2 domains with 5  $Ca^{2+}$  binding sites, some of which have mM affinities for  $Ca^{2+}$ . This requires synaptotagmin to be  $<100$  nm of the  $Ca^{2+}$  source (Fig 8) (Adler et al., 1991; Augustine et al., 1991a) and leaves unanswered whether all sites must bind  $Ca^{2+}$  to evoke exocytosis (Radhakrishnan et al., 2009). We simulated syt1  $Ca^{2+}$  binding at the plasmalemma (table 2) using data that membrane interaction of the C2A domain enhances its  $Ca^{2+}$  binding (Radhakrishnan et al., 2009).  $Ca^{2+}$  entry and buffering were again simulated. To determine the requirements for  $Ca^{2+}$  entry in the immediate vicinity of syt1 for full binding to occur, simulations were performed with 6  $Ca^{2+}$  entry sources across the surface of the varicosity such that a total of  $45 \mu\text{M}$  entered at each stimulus. Syt1 molecules were placed at 20, 100 and 200 nm from one of these sources (Fig 10A), adjacent to a vesicle. This proximal  $Ca^{2+}$  source varied from an equivalent of 0 to 5 simulated channels (0.25 pA each, 0.5 ms open time).

More than 20 nm from the proximal  $Ca^{2+}$  source no full syt1 binding events were recorded (100 random seeded simulations). Thus, the peak free  $[Ca^{2+}]_i$  throughout the varicosity ( $9.3 \mu\text{M}$ ; Fig 9C red) is insufficient to occupy all 5 syt1 binding sites. However, even one simulated VGCC within 20 nm of syt1 allowed this binding (Fig 10Bc, black) and more channels increased this probability (Fig 10Bc, red). With 5 channels there was a small probability of syt1 full binding 100 nm from the  $Ca^{2+}$  source. Within 20 nm from the  $Ca^{2+}$  source, one channel raised the transient concentration to  $110 \mu\text{M}$ ; 5 channels to  $560 \mu\text{M}$  (Fig 10Bb).

The narrow spatial halfwidths and rapid decay of  $Ca^{2+}$  within tens of nm of VGCCs indicate rapid  $Ca^{2+}$  removal from these volumes. Plots of total  $Ca^{2+}$  entering the 20 nm scale



region,  $\text{Ca}^{2+}$  bound to calbindin<sub>28K</sub> within the region, and free  $\text{Ca}^{2+}$  are shown on a log scale (Fig 10D) to encompass the range of concentrations when activation of 3 VGCCs was simulated at this site (similar results were obtained by clustering all  $\text{Ca}^{2+}$  entry at these points). Calculations of the difference between  $\text{Ca}^{2+}$  entry and  $[\text{Ca}^{2+}]_i$  and CaDye indicate that at this scale removal is dominated by diffusion. Thus, local  $\text{Ca}^{2+}$  concentrations are dominated by diffusion during paired pulse stimulation when  $\text{Ca}^{2+}$  buffers throughout the varicosity are not close to saturation (Fig 9). Consequently, no significant paired-pulse facilitation (20 and 200 ms intervals) of the local  $\text{Ca}^{2+}$  signal (within 200 nm of VGCCs) or of full syt1- $\text{Ca}^{2+}$  binding occurred (Fig 10E,F).

## Discussion

CA1 pyramidal neurons make en-passant synapses at subicular varicosities (Finch et al., 1983; Tamamaki and Nojyo, 1990). We show that single action-potential evoked  $\text{Ca}^{2+}$  transients were reliably activated in these varicosities from somatic stimulation, regardless of distance from the soma (to 600  $\mu\text{m}$ ). Using a low affinity dye that did not significantly buffer entering  $\text{Ca}^{2+}$  (Fluo-5F),  $\text{Ca}^{2+}$  transients recorded over more than 1 hour did not vary in peak amplitude or decay  $\tau$ . This result implies quantal fluctuation of neurotransmission is not mediated by fluctuations in total presynaptic  $\text{Ca}^{2+}$  entry in CA1-subicular synapses, although full  $\text{Ca}^{2+}$  occupancy of syt1 is very sensitive to local  $\text{Ca}^{2+}$  placement. This result is not broadly applicable across cell types. Cerebellar granule cell varicosities show variation in total evoked  $\text{Ca}^{2+}$  entry (Brenowitz and Regehr, 2007) whereas hippocampal dentate granule cells (Jackson and Redman, 2003), cortical pyramidal cells (Koester and Sakmann, 2000) and lamprey giant axons (Photowala et al., 2005) may not.

The reliability allows calculations of buffering capacity, molar  $\text{Ca}^{2+}$  entering, and extrusion rates. Thus, if we assume a VGCC conductance of 2 pS and mean current of 0.25 pA for 1 ms during action potentials (Weber et al., 2010), then the mean number of VGCCs per

varicosity is 27 with a mean channel density of  $7 \mu\text{m}^{-2}$ . This is consistent with findings that single channels can evoke release during artificial voltage ramps (Stanley, 1993; Haydon et al., 1994; Bertram et al., 1996) and that few channels are necessary for evoked release (Bucurenciu et al., 2008; 2010). This number of channels may still allow efficient coupling of  $\text{Ca}^{2+}$  entry to exocytosis (Scimemi and Diamond, 2012). Using simulations of  $\text{Ca}^{2+}$  distribution in varicosities we investigated how this may be achieved.

We created Monte Carlo simulations (MCell) within a model varicosity to investigate  $\text{Ca}^{2+}$  entry, diffusion, and buffering. Calbindin<sub>28K</sub> dominates  $\text{Ca}^{2+}$  buffering in CA1 pyramidal neuron dendrites (Müller et al., 2005) and its binding properties have been quantified with unprecedented accuracy (Nägerl et al., 2000) enabling its simulation. From experimental data, we found the transient peak  $[\text{Ca}^{2+}]_i$  and  $\tau$  were well-described by simulating calbindin<sub>28K</sub> with a 2:2 ratio of high and medium-affinity  $\text{Ca}^{2+}$  binding sites. Remarkably, 3D plots of  $\tau$  vs peak  $[\text{Ca}^{2+}]_i$  vs calbindin<sub>28K</sub> concentrations converge with experimental data at a calbindin<sub>28K</sub> concentration identical to these neurons' somata and dendrites ( $39.7 \mu\text{M}$  for this study vs  $40 \mu\text{M}$  for somata (Müller et al., 2005)). This 2:2 ratio of binding sites (Nägerl et al., 2000) also well fit data from cerebellar purkinje neurons (Schmidt et al., 2012). Two other buffer configurations — a 3:1 ratio of sites for calbindin<sub>28K</sub>, and of calmodulin failed to converge with experimental data (Fig 5). Our findings, while consistent with calbindin<sub>28K</sub> as a dominant buffer come with the caveat that  $\text{Ca}^{2+}$  buffering must be a function of a mix of buffers. The model also reproduced features of the experimental data, including responses to repetitive stimulation and the failure of detectable  $\text{Ca}^{2+}$  to diffuse from varicosities to their axons. Simulations were used to validate the use of exogenous dye as buffer within small varicosities. Simulating rising concentrations of the high affinity Fluo-4 dye recapitulated experimental data showing effects of buffer on measured  $\text{Ca}^{2+}$  transient decays,  $\text{Ca}^{2+}$  transient peak amplitudes, and total  $\text{Ca}^{2+}$  entering (Fig. 5).

Presynaptic VGCCs colocalize to active zones (Khanna et al., 2007) and bind SNARE complex proteins (Mochida et al., 1996; 2003; Harkins et al., 2004; Szabo et al., 2006). Furthermore, release may be activated by single VGCCs (Stanley, 1993; Bertram et al., 1996; Shahrezaei et al., 2006), although, it is unclear whether presynaptic  $\text{Ca}^{2+}$  entry occurs through channel clusters (Llinas et al., 1992; Bertram et al., 1996; Shahrezaei and Delaney, 2005) or more diffusely through a uniform distribution of channels. In the latter, individual  $\text{Ca}^{2+}$  channels might associate with primed vesicles in a 1:1 ratio. However, because  $\text{Ca}^{2+}$  signals from single VGCCs are smaller and faster than our imaging resolution,  $\text{Ca}^{2+}$  entering the terminal, even at discrete points, will appear uniformly throughout the terminal. Additionally, dye- $\text{Ca}^{2+}$ -complex diffusion may rapidly smooth signal variation. However, we have demonstrated that Fluo-5F (at 10 - 35  $\mu\text{M}$ ) caused little perturbation of the evoked transient because most  $\text{Ca}^{2+}$  binds endogenous  $\text{Ca}^{2+}$  buffers rather than dye. ( $\kappa_{\text{dye}} = 10$  to 20 for Fluo-5F vs. 75 for  $\kappa_{\text{end}}$ ). Thus, in recordings, where the terminals were close to the surface of the slice and signal-to-noise ratios were favorable, we recorded reliable localized  $\text{Ca}^{2+}$  signaling in varicosities.

These regions show faster early  $\tau$ 's, requiring double exponential fits. When plotted as  $[\text{Ca}^{2+}]_i$  vs. time, the early component  $\tau$  was close to 3 ms (as fast as we can record). Peak experimental free  $[\text{Ca}^{2+}]_i$  within these regions reached 4  $\mu\text{M}$ . While this does not represent concentrations responsible for exocytosis (Adler et al., 1991; Augustine et al., 1991b; Schneggenburger and Neher, 2000), the rapid decay from concentrations substantially greater than seen throughout the remainder of the varicosity indicate non-uniform VGCC distributions, consistent with channel clustering. We used MCell simulations to determine whether VGCC clustering explains stable hotspots of  $\text{Ca}^{2+}$  entry. Substantial spatial variation was only seen in simulated Fluo-5F responses if half or more of the channels in model synapses were clustered at one site, providing support to the hypothesis that channels cluster.

At CA1 pyramidal to subicular synapses, paired-pulse facilitation is apparent. This facilitation, as in other synapses (Katz and Miledi, 1968; Kamiya and Zucker, 1994; Zucker and Regehr, 2002), follows the time-course of presynaptic residual  $\text{Ca}^{2+}$ . However, with measured peak evoked  $\text{Ca}^{2+}$  transients of  $4 \mu\text{M}$ , simulated concentrations of  $10 \mu\text{M}$  throughout the varicosity and local concentrations exceeding  $100 \mu\text{M}$ , residual free  $[\text{Ca}^{2+}]_i$  cannot reach concentrations that will modify paired-pulse responses by a direct action on proteins that evoke synchronous release. This reiterates a number of earlier studies across many synapses (Blundon et al., 1993; Delaney and Tank, 1994; Zucker and Regehr, 2002), although  $\text{Ca}^{2+}$  signaling is necessary for short-term facilitation (Kamiya and Zucker, 1994; Mukhamedyarov et al., 2009) It has alternatively been proposed that  $\text{Ca}^{2+}$  entry following single action potentials saturates endogenous buffers (Neher, 1998) leading to enhanced subsequent transients (Jackson and Redman, 2003), or perhaps that subsequent  $\text{Ca}^{2+}$  entry is enhanced (Müller et al., 2008). In CA1 varicosities, experimentally applied paired pulse stimuli at 20 or 200 ms intervals revealed no alteration of the 2<sup>nd</sup>  $\text{Ca}^{2+}$  transient, either peak amplitude or decay. Later responses in stimulus trains of 5 stimuli do show non-linear summation, which might be attributable to buffer saturation (Neher, 1998) or a secondary source of  $\text{Ca}^{2+}$  (Cochilla and Alford, 1998; Llano et al., 2000; Emptage et al., 2001; Scott and Rusakov, 2006) though notably we recorded no effect of ryanodine.

To investigate this at molecular spatio-temporal scales, simulation was used to investigate evoked  $\text{Ca}^{2+}$  transients. Throughout the varicosity, our  $\text{Ca}^{2+}$ -dye buffering data and simulations demonstrate that most  $\text{Ca}^{2+}$  entering the varicosity is buffered endogenously at the timescale of imaging, similarly to results from other synapses (Koester and Sakmann, 2000; Jackson and Redman, 2003). Simulations also indicate that buffers re-release  $\text{Ca}^{2+}$  over seconds, and second stimuli force occupancy of most  $\text{Ca}^{2+}$  buffer binding sites. Supralinear

rises in imaged and simulated  $\text{Ca}^{2+}$  transients after more than two stimuli indicate this can be due to buffer saturation. Simulation data indicate that total free  $\text{Ca}^{2+}$  varicosity concentrations reach  $9.3 \mu\text{M}$  after a single stimulus, and that buffer saturation allows a whole-terminal, paired-pulse enhancement of  $\text{Ca}^{2+}$  transients up to 1s after the first stimulus (Fig 10). However, this does not account for  $\text{Ca}^{2+}$  at scales of tens of nanometers and picoseconds in which  $\text{Ca}^{2+}$  binds to synaptotagmin1.

When  $\text{Ca}^{2+}$  transients were simulated at the nanometer scale local to syt1 molecules, it is clear that  $\text{Ca}^{2+}$  dispersal from such small regions is dominated by diffusion. Rates of removal due to buffering or local accumulation are three orders of magnitude less than this diffusion. Because diffusion dominated there was no detectable difference in the amplitudes or distribution of two transients in paired pulses at intervals of 20 or 200 ms at this scale. Indeed, modeling binding of 5  $\text{Ca}^{2+}$  to syt1 indicates that  $\text{Ca}^{2+}$  entry within less than 50 nm of synaptotagmin causes its full occupancy. This result, along with our experimental and modeling data indicate clustering of  $\text{Ca}^{2+}$  channels may contribute to release at this synapse. Indeed such clusters of channels that are constrained to be further than 30nm from the fusion apparatus has been proposed in Calyceal synapses (Keller et al., 2015), although in those synapses  $\text{Ca}^{2+}$  requirements for release are as low as  $25 \mu\text{M}$  (Schneppenburger and Neher, 2000). However full  $\text{Ca}^{2+}$  occupancy of the synaptotagmin1 model is not enhanced by paired pulses. If residual  $\text{Ca}^{2+}$  is responsible for paired pulse facilitation, for which there exists a great deal of evidence (Zucker and Regehr, 2002), then these data, in addition to data indicating the prolonged binding of  $\text{Ca}^{2+}$  buffers, point to a  $\text{Ca}^{2+}$  binding site distinct from that involved in evoked release (i.e. synaptotagmin 1) as mediated by a short-term enhancement of neurotransmitter release at these synapses, such as synaptotagmin 7 (Jackson and Redman, 2003; Jackman et al., 2016). This effect is perhaps also consistent with an effect of residual bound  $\text{Ca}^{2+}$  on vesicle priming

(Neher and Sakaba, 2008) and the size of the readily releasable pool (Thanawala and Regehr, 2013).

We conclude that the  $\text{Ca}^{2+}$  responsible for synchronous evoked release at en-passant pyramidal neuron varicosities reaches hundreds of micromolar concentrations at clusters of  $\text{Ca}^{2+}$  channels local to the release machinery. These clusters may represent up to half of the  $\text{Ca}^{2+}$  entry in the terminal as a whole for which the activation of fewer than 30  $\text{Ca}^{2+}$  channels is required, but that dispersal from these sites is diffusion dominated and does not show accumulation during repetitive stimulation. Nevertheless, buffer saturation during repetitive stimulation does account for a varicosity wide enhancement of  $\text{Ca}^{2+}$  transient amplitudes which may impact short-term enhancement by recruiting other  $\text{Ca}^{2+}$  binding proteins.

## **Materials and Methods**

### *The preparation*

Experiments were performed on hippocampal slices (300  $\mu\text{m}$ ) of male or female 20-22-day-old Sprague-Dawley rats anesthetized with isoflurane and decapitated. Hippocampi were isolated under semi-frozen Krebs Henseleit solution (in mM): 124 NaCl, 26  $\text{NaHCO}_3$ , 1.25  $\text{NaH}_2\text{PO}_4$ , 3 KCl, 2  $\text{CaCl}_2$ , 1  $\text{MgCl}_2$ , 10 D-glucose, bubbled with 95%  $\text{O}_2$ -5%  $\text{CO}_2$ , sliced using a Vibratome. The recording chamber was superfused at 2 ml/min and maintained at  $28 \pm 2$  °C. Experiments were performed in accordance with institutional guidelines of the University of Illinois at Chicago and the Association for Assessment and Accreditation of Laboratory Animal Care.

### *Electrophysiology*

CA1 pyramidal neurons were whole-cell clamped following visual identification using an upright microscope with an Axopatch 200A amplifier (Axon Instruments). Patch pipettes (4-5 M $\Omega$ ) contained solution (in mM): potassium methane sulphonate 146,  $\text{MgCl}_2$  2, EGTA 0.025, HEPES

9.1, ATP 5 and GTP 2.5, pH adjusted to 7.2 with KOH. Pipettes were also filled with either Fluo-4 (1 mM) or Fluo-5F (200  $\mu$ M) and Alexa 594 hydrazide (250  $\mu$ M). Subicular pyramidal neurons were recorded under whole cell conditions but were held under voltage clamp to record synaptic inputs. In these latter neurons access resistance was monitored with a 10 mV voltage step before each episode. Focal stimuli (0.2 ms, 20  $\mu$ A or less) were applied over CA1 axons using glass-insulated monopolar tungsten microelectrodes. Cells were labeled with dye by allowing sufficient time for diffusion from the patch pipette in the live cell. Axons were tracked from the soma to their presynaptic terminals in the subiculum (Fig 1A) (Hamid et al., 2014).

### *Imaging*

Confocal microscopy was used to image individual varicosities of CA1 pyramidal neurons, with a 60X 1.1 NA water-immersion lens using a modified Biorad MRC 600 confocal microscope with excitation wavelengths at 488 and 568 nm (Bleckert et al., 2012).  $\text{Ca}^{2+}$ -sensitive dyes of one of two different affinities to  $\text{Ca}^{2+}$  were visualized in each experiment. Dye concentration was determined by pairing these dyes with a  $\text{Ca}^{2+}$ -insensitive dye (Alexa 594 hydrazide, molecular weight – 736  $\text{g}\cdot\text{mol}^{-1}$ , identical to Fluo-5F and almost identical to that of Fluo-4 – 737  $\text{g}\cdot\text{mol}^{-1}$ ). Co-diffusion of the Fluo-4 and Alexa 594 hydrazide was demonstrated by recording absolute values of the fluorescence at axonal varicosities at rest over time. Alexa 594 hydrazide was excited with a 568 nm laser and imaged in long-pass (>580 nm). Fluo dyes were separately excited with a 488 nm laser and imaged in bandpass (510-560 nm). Images were taken separately to ensure no cross channel bleed-through.

Fluo-4 and Alexa 594 hydrazide signals at varicosities were identified within 20 mins of whole-cell access in 10 neurons. Signal strength was normalized to this time point for both dyes. A comparison of the increase in dye intensity over the following 20 mins with no stimulation reveals strong correlation with a slope of 1.01 (Fig 10B, this fit was forced through the origin because both dyes must be at a concentration of zero at the start of the experiment. Without

this, the slope was 0.94). As an independent control to confirm that the slight difference in molecular weights alone does not alter rates of diffusion of the two dyes in the axon an MCell model was constructed of axons (diameter, 0.12  $\mu\text{m}$ , varicosities at 4  $\mu\text{m}$  intervals). Release of dyes were simulated within a 10  $\mu\text{m}$  diameter soma and diffusion to varicosities up to 500  $\mu\text{m}$  from the soma were simulated. There was no significant difference between rates of diffusion of the two dyes and diffusion times to varicosities were within times seen for experimental data (supplementary Fig 1) in which dye diffusion into varicosities was monitored using the Alexa 594 hydrazide fluorescence signal. Thus, both dyes reach the varicosity at the same rate, which allows the use of Alexa 594 hydrazide as a "standard candle" for measuring dye concentration. Thus, Alexa 594 hydrazide fluorescence in axon varicosities was used to determine the concentration of  $\text{Ca}^{2+}$ -sensitive dye in the terminal by calculation of that fluorescence as a fraction of its fluorescence in the recording pipette where its concentration was known.

The fluorescence intensity of Alexa 594 hydrazide fluorescence was measured throughout the experiment in the terminal using fixed parameters on the imaging system. A plot of intensity against time approached an asymptote towards 60 mins after obtaining whole-cell access. The absolute fluorescence at the electrode tip was compared to that of the axon varicosities. At the end of the experiment the axon typically blebbed to  $\sim 5 \mu\text{m}$ —large enough for the microscope point spread function to allow for absolute fluorescence of the axon to be measured. This phenomenon was never present during the recording of stimulation-evoked  $\text{Ca}^{2+}$  transients. Its occurrence was observed subsequent to a rise in resting  $\text{Ca}^{2+}$  seen after about an hour of recording. Fluorescence in the tip of the pipette where the dye concentration was known was measured in the tissue at the same depth as the axon. This allowed calculation of the axon dye concentration after the experiment ended. It was then straightforward to compare all previously measured values of Alexa 594 fluorescence, to give absolute dye concentrations throughout the experiment. Recordings in which all of these criteria could not be



met were rejected from analysis. Absolute  $\text{Ca}^{2+}$  concentrations were calculated in each varicosity using equations 1 and 2 (below). For these calculations we obtained saturated Fluo-4 or Fluo-5F intensity values in varicosities at the end of the experiment by repetitive stimulation and calculated minimum fluorescence values determined from the data in Figure 1C.

$\text{Ca}^{2+}$  binding properties of Fluo-4 and Fluo-5F were determined using  $\text{Ca}^{2+}$  standards (Invitrogen) at  $28 \pm 2$  °C (the temperature at which experiments were performed) and a pH of 7.2 (to which the intracellular patch solutions were buffered). Log plots of these data points were used to determine  $K_d$  (Fig 1C). Calibrated measurements of dye fluorescence within neurons were also made for each dye ( $n=2$  for Fluo-5F and  $n=2$  for Fluo-4). Whole-cell recordings were obtained in which the patch electrode contained either Fluo-4 or Fluo-5F. Whole cell access was maintained until soma and dendrites were clearly labeled. The electrode was then carefully withdrawn. Baseline fluorescence intensities were measured. The  $\text{Ca}^{2+}$  ionophore, ionomycin (5  $\mu\text{M}$ ) was added to the superfusate. Fluorescence intensities were measured at 2 min intervals until the signal reached a stable maximum. The superfusate was then replaced with a solution containing 0  $\text{Ca}^{2+}$  and 10 mM EGTA and images taken until the fluorescence intensity reached a stable minimum. This solution was then replaced with a solution containing buffered  $\text{Ca}^{2+}$ -EGTA ( $[\text{Ca}^{2+}] = 0.78$   $\mu\text{M}$ ) and fluorescence in the neuron was measured. Ratios of maxima to minima were very close to those obtained with standards. The standard data points were then plotted over the log plots obtained *in vitro*. A small correction was applied to the calculated  $K_d$  for Fluo-4 (black line, Fig 1B) but the data obtained with Fluo-5F gave a value of  $K_d$  that was not measurably different than that obtained *in vitro*. These values (Fluo-4  $K_d = 0.44$   $\mu\text{M}$ ,  $F_{\min}/F_{\max} = 0.066$  and Fluo-5F  $K_d = 1.49$   $\mu\text{M}$ ,  $F_{\min}/F_{\max} = 0.023$ ) were used in all subsequent calculations.

#### *Effects of introduction of buffers to cell compartments*

It is possible to calculate the intracellular  $\text{Ca}^{2+}$  concentration ( $[\text{Ca}^{2+}]_i$ ). For a non-ratiometric dye with a Hill coefficient of 1,  $[\text{Ca}^{2+}]_i$  is determined from equation 1:

$$[Ca^{2+}]_i = K_d \frac{(F - F_{min})}{(F_{max} - F)} \quad (1)$$

The  $Ca^{2+}$  dye minimum fluorescence intensity ( $F_{min}$ ) was calculated as a ratio of  $F_{max}$  determined from the dye calibration results summarized in figure 1B, from each cell at the end of the experiment. Absolute values of  $F_{min}$  and  $F_{max}$  were corrected by the observed value of Alexa 594 for each time point as a ratio of its value at the end of the experiment when  $F_{max}$  was measured. A corrected value of  $Ca^{2+}$  dye fluorescence in the varicosity ( $F$ ) was calculated from the measured varicosity fluorescence ( $F_{meas}$ ) at each time point used for analysis and then re-expressed as a ratio of  $F_{max}$ , corrected by comparison to the Alexa 594 signal throughout the experiments. This is because  $F_{max}$  was determined at the end of the experiment and consequently needed to be scaled for each time point at which measurements were made during the experiment. Thus,  $F$  is given by:

$$F = \frac{D_F}{D} \cdot \frac{F_{meas}}{F_{max}} \quad (2)$$

where  $D$  is the Alexa 594 fluorescence at each time, and  $D_F$  is the final Alexa 594 fluorescence. Thus, for experiments using Fluo-4 or Fluo-5F, where  $F$  and  $F_{min}$  in equation (1) are ratios of  $F_{max}$ , and  $F_{max} = 1$ ,  $[Ca^{2+}]_i$  was calculated as follows:

$$[Ca^{2+}]_i = 0.44 \frac{\left(\frac{D_f \cdot F_{meas}}{D} - 0.023\right)}{\left(1 - \frac{D_f \cdot F_{meas}}{D}\right)} \quad (3)$$

These experiments required constant laser intensity and recording parameters throughout the experiment. To minimise photobleaching, imaging was performed only transiently during evoked responses (1s per stimulus, < 15 s total per experiment). To use calcium-sensitive dyes as buffers to investigate the fate of  $Ca^{2+}$  that enters presynaptic terminals on stimulation, we must calculate their buffering capacities ( $\kappa_{dye}$ ) in the cytosol of the terminal. Since each molecule of

dye binds just one  $\text{Ca}^{2+}$  ion, the Hill equation with a coefficient of one can be used to calculate  $\kappa_{\text{dye}}$  over a change in  $\text{Ca}^{2+}$  concentration ( $\Delta[\text{Ca}^{2+}]_i$ ) from  $[\text{Ca}^{2+}]_1$  to  $[\text{Ca}^{2+}]_2$ .

$$\kappa_{\text{dye}} = \frac{\Delta[\text{Ca}_{\text{dye}}]}{\Delta[\text{Ca}^{2+}]_i} = \frac{[\text{Dye}_{\text{total}}]}{k_d \left[ \left( 1 + \frac{[\text{Ca}^{2+}]_2}{k_d} \right) \left( 1 + \frac{[\text{Ca}^{2+}]_1}{k_d} \right) \right]} \quad (4)$$

where  $[\text{Ca}_{\text{Dye}}]$  is the concentration of  $\text{Ca}^{2+}$ -bound dye, and  $[\text{Dye}_{\text{total}}]$  is the total dye concentration. Note that this approach takes into account the change in  $[\text{Ca}^{2+}]_i$  in the pyramidal cell terminals during the stimulus which is large (approx. 1  $\mu\text{M}$ ). Other approaches with smaller  $\text{Ca}^{2+}$  changes use resting  $[\text{Ca}^{2+}]_i$  as a basis for calculating  $\kappa_{\text{dye}}$  (Neher and Augustine, 1992).

When a rapid  $\text{Ca}^{2+}$  pulse enters a cell compartment, free  $\text{Ca}^{2+}$  may be removed first by binding to intracellular endogenous buffers, and possibly by diffusion into neighboring compartments, and then by pumps. We have used methods used by Jackson and Redman (Jackson and Redman, 2003) originally described by Melzer et al (Melzer et al., 1986) to determine the buffering characteristics of  $\text{Ca}^{2+}$  in CA1 pyramidal neuron presynaptic varicosities. From these methods we can determine the quantity of calcium entering the varicosity, the mean free  $[\text{Ca}^{2+}]_i$  within the varicosity immediately after the stimulus, the endogenous  $\text{Ca}^{2+}$  buffering capacity, and the rate of removal of  $\text{Ca}^{2+}$  from the cytosol. From this we have developed simulations of  $\text{Ca}^{2+}$  entry, diffusion, and buffering in the presynaptic terminal.

The relationship between  $\text{Ca}^{2+}$  unbinding rates from the dye and rebinding either to dye or endogenous buffers can be used to calculate endogenous buffering capacity ( $\kappa_{\text{end}}$ ) of the terminal. If the value of  $\kappa_{\text{dye}}$  varies during the experiment then we assume a constant rate of  $\text{Ca}^{2+}$  extrusion from the terminal ( $\tau_{\text{ext}}$ ). The decay rate ( $\tau$ ) of a pulse-like  $\text{Ca}^{2+}$  signal in a cell compartment is described by the equation:

$$\tau = \tau_{ext}(1 + \kappa_{end} + \kappa_{dye}) \quad (5)$$

Thus, we obtained values of  $\kappa_{end}$  by fitting equation (5) to plots of  $\tau$  from experimental data vs  $\kappa_{dye}$  from equation (4). This approach does have drawbacks, if processes modifying  $Ca^{2+}$  removal or adding to cytosolic  $Ca^{2+}$  occur after action potentials. Such processes include diffusion of the  $Ca^{2+}$ -dye complex from the measured compartment, or release of  $Ca^{2+}$  from internal stores. In equation (5) these effects are grouped into a single variable  $\kappa_{end}$ . Nevertheless, the result ( $\kappa_{end}$ ) can be obtained independently of computed absolute values of  $Ca^{2+}$ , or even of background fluorescence measurement errors. It therefore serves as an independent measure of whether the following measurements of  $\kappa_{end}$  are reasonable.

By measuring the peak amplitude of the free  $Ca^{2+}$  transient throughout the varicosity over a range of values of  $\kappa_{dye}$ , we may assume that the total change in  $Ca^{2+}$  concentration due to a stimulus is described by the equation:

$$\Delta[Ca]_{total} = \Delta[Ca^{2+}]_i + \Delta[Ca_{dye}] + \Delta[Ca_{end}] \quad (6) \text{ and:}$$

$$\Delta[Ca_{dye}] = \kappa_{dye} \cdot \Delta[Ca^{2+}]_i \quad (7) \text{ and:}$$

$$\Delta[Ca_{end}] = \kappa_{end} \cdot \Delta[Ca^{2+}]_i \quad (8)$$

Where  $[Ca_{end}]$  is the concentration of endogenous buffer bound to  $Ca^{2+}$  and  $\Delta[Ca]_{total}$  is the total stimulus-evoked change in calcium concentration in the cell compartment. Thus combining these equations we may state:

$$\Delta[Ca^{2+}]_i = \frac{\Delta[Ca]_{total}}{(1 + \kappa_{dye} + \kappa_{end})} \quad (9)$$

Where  $\Delta[Ca^{2+}]_i$  varies with  $\kappa_{dye}$ . Values of  $\Delta[Ca^{2+}]_i$  are computed from our data using equation (3) and values of  $\kappa_{dye}$  from equation (4). For each action potential, as the value of  $\kappa_{dye}$  rises it will come to dominate binding of  $Ca^{2+}$  entering the cell compartment. This approach is useful because the value of  $\Delta[Ca_{dye}]$  can be calculated for each action potential in each presynaptic

terminal as the value of  $\kappa_{dye}$  increases by diffusion of dye from the soma. Equations (6), (7), and (8) can also give:

$$\Delta[Ca]_{total} = \Delta[Ca]_{dye} \cdot \left\{ \frac{(\kappa_{end} + 1)}{\kappa_{dye}} + 1 \right\} \quad (10)$$

Values of  $\Delta[Ca]_{total}$ , and  $\kappa_{end}$  can be determined by extracting constants from fits of either equation (9) or (10). The true value of peak  $\Delta[Ca^{2+}]_i$  in the varicosity when no dye is present is obtained by extrapolating the fit to the y intercept in equation (9) where  $\kappa_{dye} = 0$ . To calculate total  $Ca^{2+}$  entering the terminal from the concentrations obtained from either equation (9) or (10), we calculated varicosity volumes from images using Alexa 594 hydrazide. Varicosities are larger than the smallest structures that can be imaged in our microscope. Point spread data from  $0.2 \mu m$  latex microspheres were determined by imaging under the same light path as all data in this study (568 nm excitation, long pass emission). The point spread was Gaussian in x-y and z dimensions with an x-y dimension half maximal width of  $0.45 \mu m$ .

Varicosities approximated ellipsoids with the long axis along the line of the axon. We measured length (l) and width (w), assuming depth was similar to the width because it was not possible to obtain sufficient z-plane resolution to accurately determine depth. Mean measured varicosity length (l) was  $2.3 \pm 0.2 \mu m$  and width (w) was  $1.2 \pm 0.1 \mu m$ . These values are quite similar to terminal sizes obtained from electron microscopic images (Harris and Weinberg, 2012).

Assuming the varicosities were ellipsoid, volume of the varicosity is given by:

$$volume = \frac{4}{3} \pi \left\{ \left( \frac{w}{2} \right)^2 \cdot \frac{l}{2} \right\} \quad (11)$$

Chemicals were obtained as follows: Alexa dyes, Fluo-4, Fluo-5F,  $Ca^{2+}$  standards; (Thermo Fisher, Eugene OR), salts, buffers etc; Sigma (St Louis MO). Fits to datasets were performed in Igor Pro (Wavemetrics, IA USA). Errors bars from fitted data represent the 95%

confidence limits of those fits. Otherwise errors are reported as the standard error of the mean. Significance was tested with Student's t test or 2 factor ANOVAs where appropriate.

### ***Simulations***

Monte Carlo simulations were applied to  $\text{Ca}^{2+}$  buffering within a model of the CA1 axon varicosity based on the data obtained experimentally in this study. Simulations were run in the MCell environment (Kerr et al., 2008) in which a 3D mesh model of the presynaptic terminal was created based on measurements determined from these experiments and from electron microscopic images of hippocampal presynaptic varicosities (Harris and Weinberg, 2012).  $\text{Ca}^{2+}$  entry, diffusion binding and removal from the terminal were modeled using initial parameters obtained from experimental data in this study, and from the literature and from published sources. Possible  $\text{Ca}^{2+}$  binding proteins and their concentrations were investigated by comparing multiple parameters from experimental data and the results of simulations. All of the parameters used are outlined in tables 1, 2, and 3. Animated visualizations of these simulations are shown in Supplementary materials.

Figure 1. Calibration of dye diffusion and  $\text{Ca}^{2+}$  response

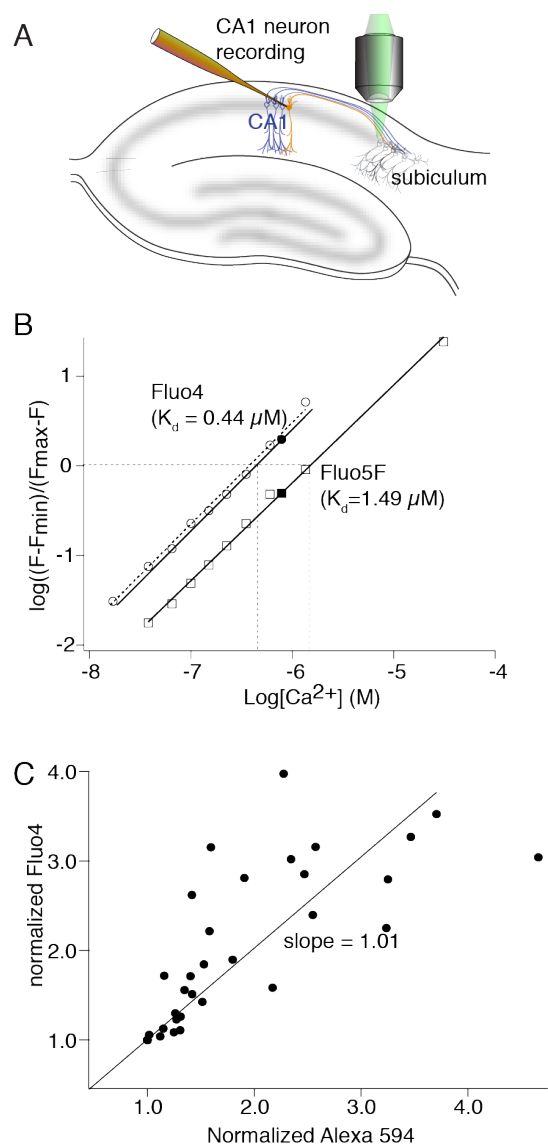

**A)** Recording arrangement for imaging presynaptic varicosities. CA1 pyramidal neurons were whole-cell patch clamped with electrodes containing Fluo-4 (or 5F) and Alexa 594 hydrazide. After allowing time for diffusion axons and varicosities were traced to the subiculum by imaging Alexa 594 hydrazide and  $\text{Ca}^{2+}$  was imaged using the Fluo dye.

**B)** Calibration of the  $\text{Ca}^{2+}$ -sensitive dyes. Fluo-4 (circles) and Fluo-5F (squares) were imaged on the confocal system used for all measurements. Fluorescence intensity was measured over a range of  $\text{Ca}^{2+}$  standard concentrations in fixed concentrations of EGTA. Log-log plots gave a

slope (Hill coefficient) of 1.  $\text{Ca}^{2+}$  concentrations were applied to a patch-clamped cell by application of ionomycin. From saturated  $\text{Ca}^{2+}$  concentrations, zero  $\text{Ca}^{2+}$  and a fixed value of  $\text{Ca}^{2+}$  ( $0.78 \mu\text{M}$  in EGTA buffered  $\text{Ca}^{2+}$  solution), the closed circle (Fluo-4) and closed square (Fluo-5F) values in the graphs were calculated. These values were used to correct the plots to values in the intracellular environment (solid lines) and to calculate values of  $K_d$  for the two dyes in the cells ( $0.44$  and  $1.49 \mu\text{M}$ ).

**C)** The dyes introduced from the patch pipette showed equal rates of diffusion into axon varicosities. Intensities of Fluo-4 and Alexa 594 hydrazide measured by separate illumination at 488 nm and 568 nm respectively were normalized to the value of the fluorescence value obtained following identification of a varicosity and plotted against one another for points measured over the next 20 mins. The slope of a line fitted to this data through (0,0, because both dye concentrations were zero at the experiment start) is close to unity.



Figure 2. Effects of high- and low-affinity dyes on presynaptic  $\text{Ca}^{2+}$  transients

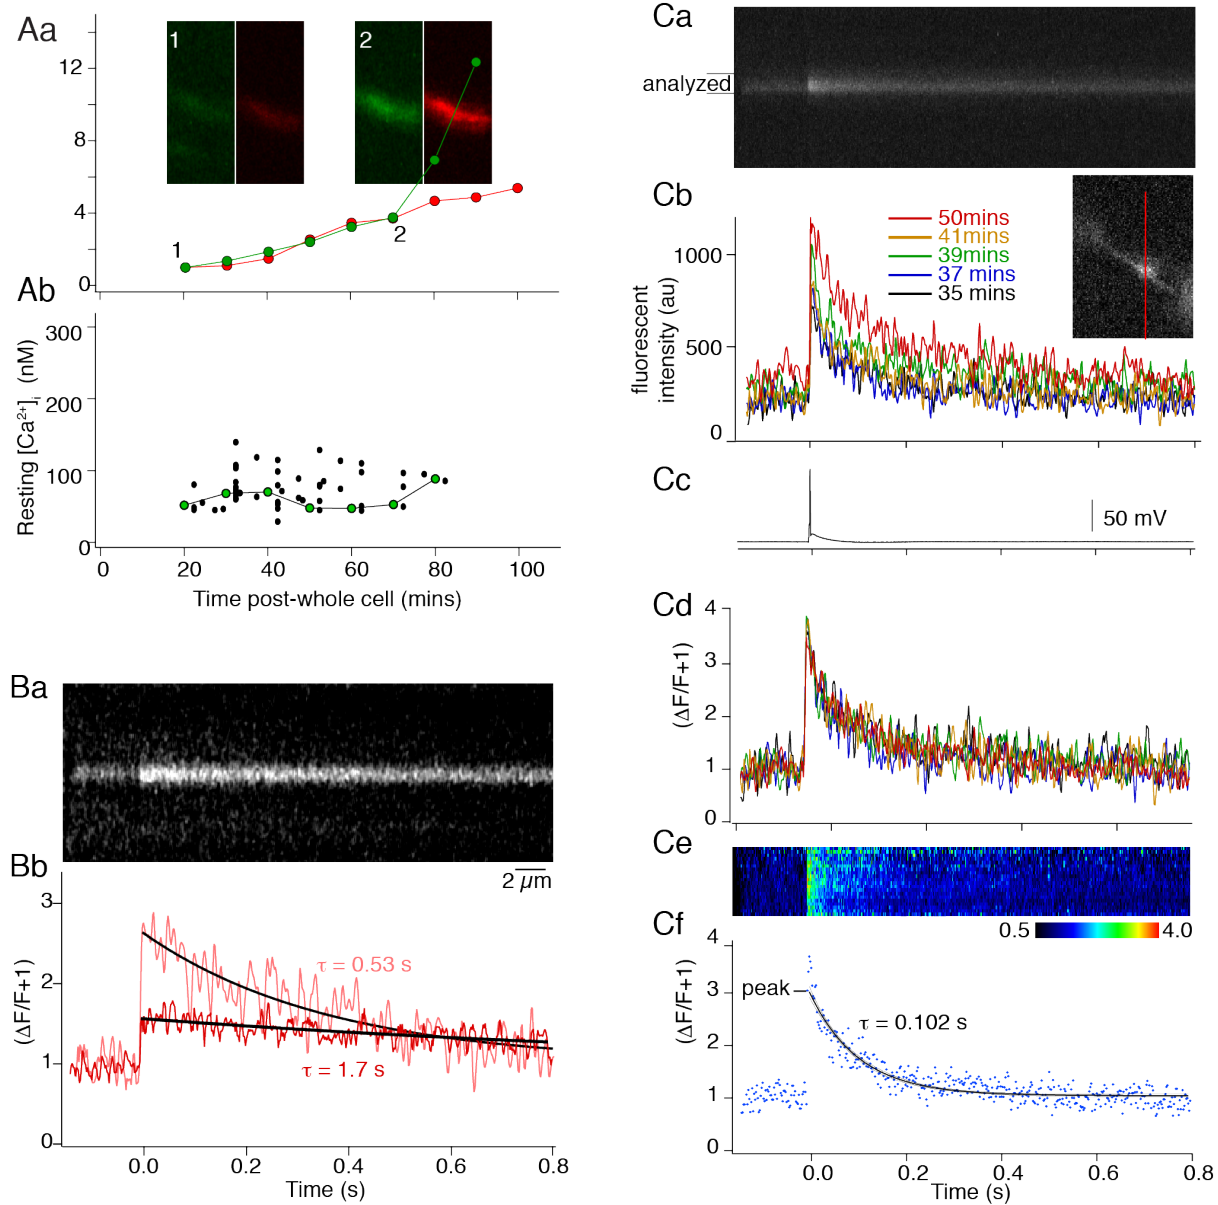

**Aa)** CA1 pyramidal neurons were recorded in whole-cell and filled with Alexa 594 hydrazide (red,  $250 \mu\text{M}$ ) and Fluo-4 (green,  $1 \text{ mM}$ ) from the pipette. Each dye's intensity normalized to values at 20 mins post-whole cell was plotted against time in one varicosity. Insets – green, Fluo-4 and red, Alexa 594 in the same varicosity after 20 mins and 70 mins. **(Ab)** Resting  $[\text{Ca}^{2+}]_i$

for all cells calculated from equations (1) and (2). Linked green circles – values obtained from cell in **(Aa)**.

**Ba)** Line scans were performed through varicosities of neurons filled with Alexa 594 hydrazide and Fluo-4, 1mM.  $\text{Ca}^{2+}$  transients were evoked by an action potential evoked at the soma. Fluo-4 was imaged during the line scan. A first action potential- evoked  $\text{Ca}^{2+}$  transient recording (~20 mins post-whole cell) was made as dye diffused into the varicosity (transient decay rate,  $\tau = 0.53$  s, **Bb** pink). 25 mins later the peak amplitude was reduced and  $\tau$  increased ( $\tau = 1.7$  s, red).

**Ca)** Line scans from action-potential-evoked  $\text{Ca}^{2+}$  transient from a presynaptic varicosity (inset to **Cb**) filled with the lower affinity  $\text{Ca}^{2+}$  dye, Fluo-5F. Line scan was through the red bar. **(Cb)** Intensities of five line scans from the analyzed region in **(Ca)**. Colors represent indicated time post whole-cell access when responses were measured. **(Cc)** Depolarizing somatic current-evoked action potentials, which evoked the  $\text{Ca}^{2+}$  transients.

**Cd)** Responses from **(Cb)** expressed as  $\Delta F/F+1$  where F is the pre-stimulus Fluo-5F fluorescence. The  $\text{Ca}^{2+}$  transient is identical for each stimulus. **(Ce)** Color-coded representation of the line-scan as  $\Delta F/F+1$  after background subtraction from analyzed region in **(Ca)**. **(Cf)** Single  $\text{Ca}^{2+}$  transient signal after 37 mins whole cell. The data was fit by a single exponential.

Figure 3. Analysis of  $\text{Ca}^{2+}$  transients and buffering using  $\text{Ca}^{2+}$ -sensitive dyes.

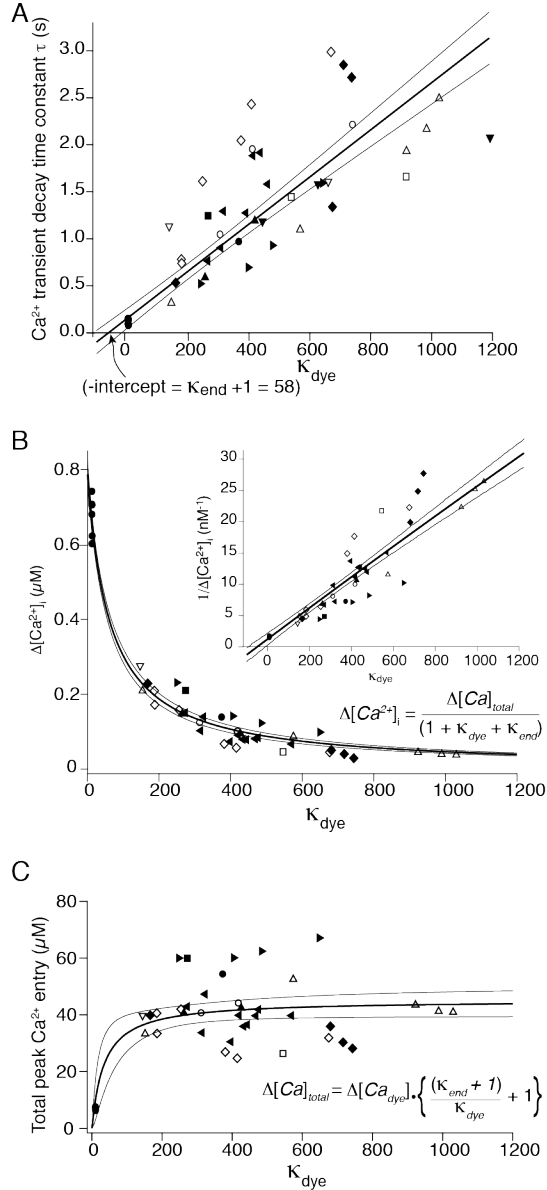

**A)** From the fits to  $\text{Ca}^{2+}$  transients obtained with Fluo-4 and Fluo-5F at various values of  $\kappa_{\text{dye}}$ , decay time constants ( $\tau$ ) were plotted against  $\kappa_{\text{dye}}$ . (Each symbol used represent a different cell)

The negative intercept on the abscissa is a measure of endogenous buffering capacity ( $\kappa_{\text{end}}$ ) of the terminal (from equation 5).

**(B)** Evoked change in  $[Ca^{2+}]_i$  calculated from equation 3 is plotted against dye buffering capacity ( $\kappa_{dye}$ ) for the same data. The curved line represents a fit of equation 9. The inset represents the equivalent linear fit to the inverse of  $\Delta[Ca^{2+}]_i$  where the convergence of the fit with the abscissa represents  $\kappa_{end}$  and the slope is a function of  $\Delta[Ca^{2+}]_{total}$ . The fits give values for the peak free  $Ca^{2+}$  concentration, the varicosity  $\kappa_{end}$  and total  $Ca^{2+}$  entering.

**(C)** Values of total peak  $[Ca^{2+}]$  bound to dye calculated from the product of measured  $\Delta[Ca^{2+}]$  and the  $\kappa_{dye}$  were plotted against  $\kappa_{dye}$ . These data were fit to equation 10. As the curve reaches an asymptote at high values of  $\kappa_{dye}$ , this allows calculation of the total molar quantity of  $Ca^{2+}$  entering the varicosity following one action potential.

Error bands are for 90% confidence intervals.

Figure 4. The  $\text{Ca}^{2+}$  transient is unaffected by block of release of  $\text{Ca}^{2+}$  from internal stores, and its peak amplitude is correlated with the inverse of its decay.

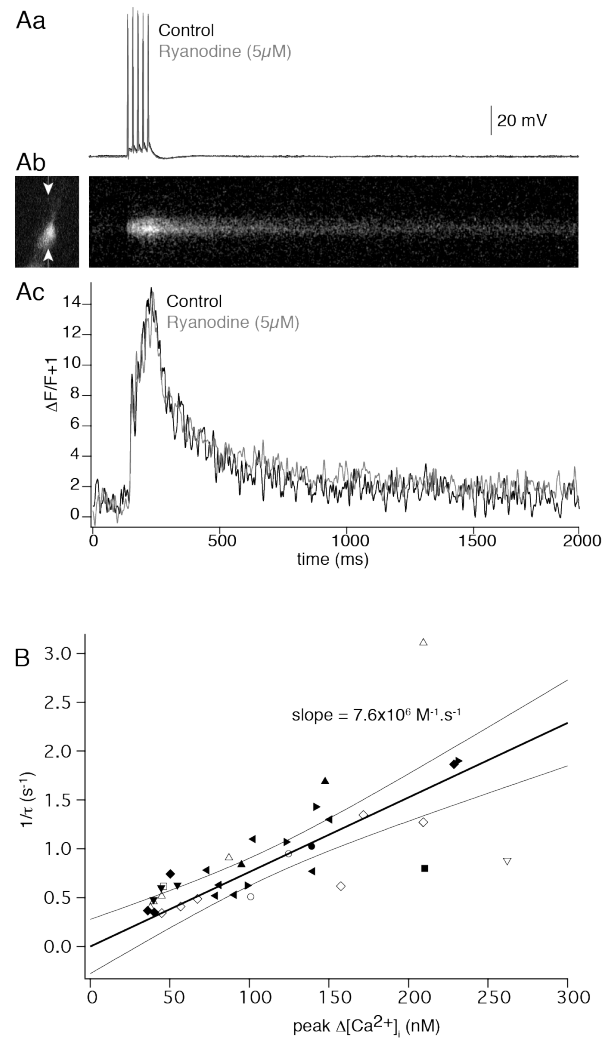

**A)** Repetitive stimulation evokes summing  $\text{Ca}^{2+}$  transients that are unaffected by ryanodine.

**(Aa)** Five action potentials at 20 Hz evokes a summing  $\text{Ca}^{2+}$  transient measured using Fluo-5F in a CA1 neuron varicosity **(Ab)** which was unaffected by a 30 min application of ryanodine (5  $\mu\text{M}$ ; **Ac**, grey.)

**B)** Inverse of the  $\text{Ca}^{2+}$  transient decay rate vs. peak  $\Delta[\text{Ca}^{2+}]_i$  for varicosities in which the value of  $\kappa_{\text{dye}}$  exceeded 150. From the slope, the extrusion rate of  $\text{Ca}^{2+}$  from the varicosity was determined (equal to slope x total molar  $\text{Ca}^{2+}$  entry). (Each symbol used represent a different cell)

Figure 5. Monte Carlo simulation of  $\text{Ca}^{2+}$  transients and validation against experimental data.

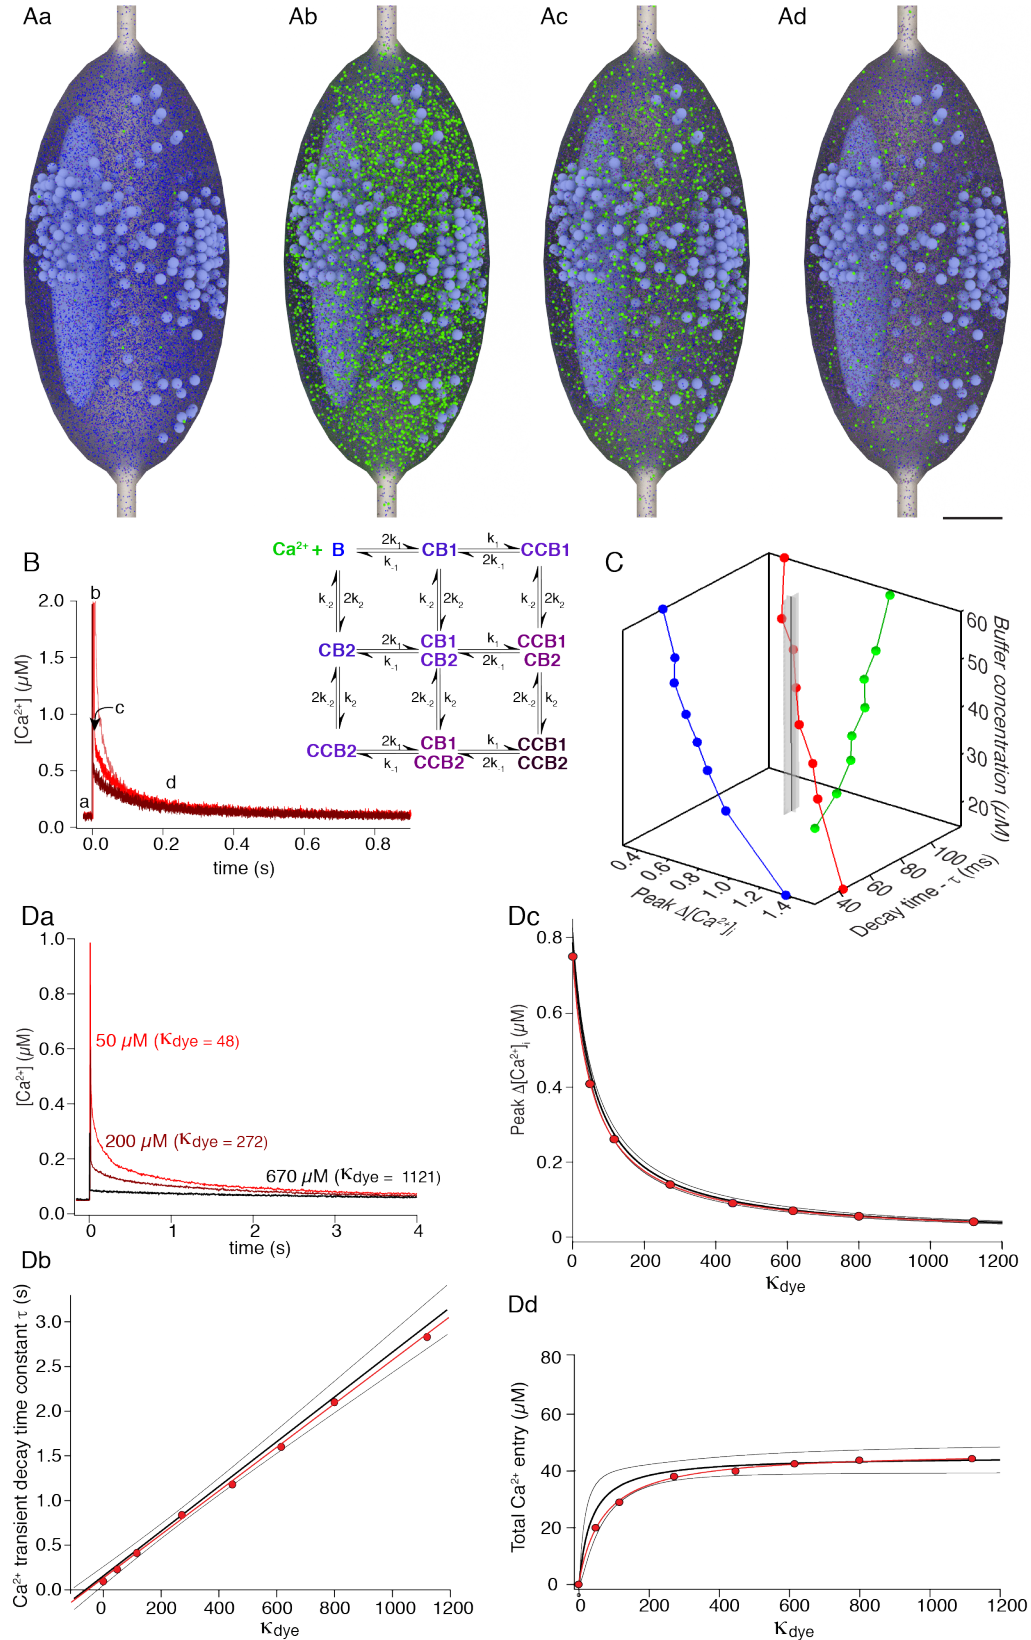

**A)** The varicosity was modeled as an ellipsoid  $2 \times 1 \times 1 \mu\text{m}$  and contained 320 synaptic vesicles, and one large internal structure to provide sites for  $\text{Ca}^{2+}$  intrusion (i.e., ER/mitochondrion). A variable quantity of  $\text{Ca}^{2+}$  buffer (red in **Aa**) was modeled. Images show free  $\text{Ca}^{2+}$  ions (green) and  $\text{Ca}^{2+}$ -bound states of calbindin<sub>28k</sub> as per the color scheme in the kinetic model below. Times indicated by letters in **B**. Parameter values are from table 1 or from varying buffer concentrations. **(Aa)** pre-stimulus state **(Ab)** at peak of stimulus **(Ac)** at first time point resolvable with fluorescence imaging **(Ad)** after 1 s post stimulus.

**B)** Simulated total varicosity free  $[\text{Ca}^{2+}]_i$  following stimuli at three calbindin<sub>28k</sub> concentrations (15  $\mu\text{M}$ , pink; 40  $\mu\text{M}$ , red; 60  $\mu\text{M}$ , black). Single exponential fits (red) were applied to these simulations and values of peak  $\Delta[\text{Ca}^{2+}]_i$  and decay ( $\tau$ ) were obtained from these fits. Inset shows kinetic scheme for the calbindin<sub>28k</sub> 2:2 ratio. Parameters in table 2.

**C)** 3D plot of simulated  $\tau$ , peak  $\Delta\text{Ca}^{2+}$  against varying buffer concentrations (15 – 60  $\mu\text{M}$ ) following simulated varicosity stimulation. Blue – 3:1 ratio model of calbindin<sub>28k</sub>, red – 2:2 model of calbindin<sub>28k</sub>, green – model of calmodulin. Model parameters in table 2. The vertical black line and gray shading represent the values of experimentally obtained  $\tau$ , peak  $\Delta\text{Ca}^{2+}$  and associated standard errors. These data converge only with the 2:2 ratio of calbindin<sub>28k</sub> at a concentration of 39.7  $\mu\text{M}$ .

**D)** Varying  $\text{Ca}^{2+}$ -sensitive dye concentrations (Fluo-4, see table 1) were simulated and resultant  $\text{Ca}^{2+}$  transients graphed. **(Da)** Responses shown with dye concentrations of 50, 200, and 670  $\mu\text{M}$ . **(Db-Dd)** decay time, peak  $\Delta\text{Ca}^{2+}$ , and total  $\text{Ca}^{2+}$  entry from these simulated transients over values of  $\kappa_{\text{dye}}$  from 0 to 1121 (red circles and lines) is plotted as per Fig 3C and overlaid on the fits and 90% confidence intervals of that experimental data.

Figure 6.  $\text{Ca}^{2+}$  or  $\text{Ca}^{2+}$  dye complex can show rapid diffusion from presynaptic terminal hotspots immediately after the stimulus.

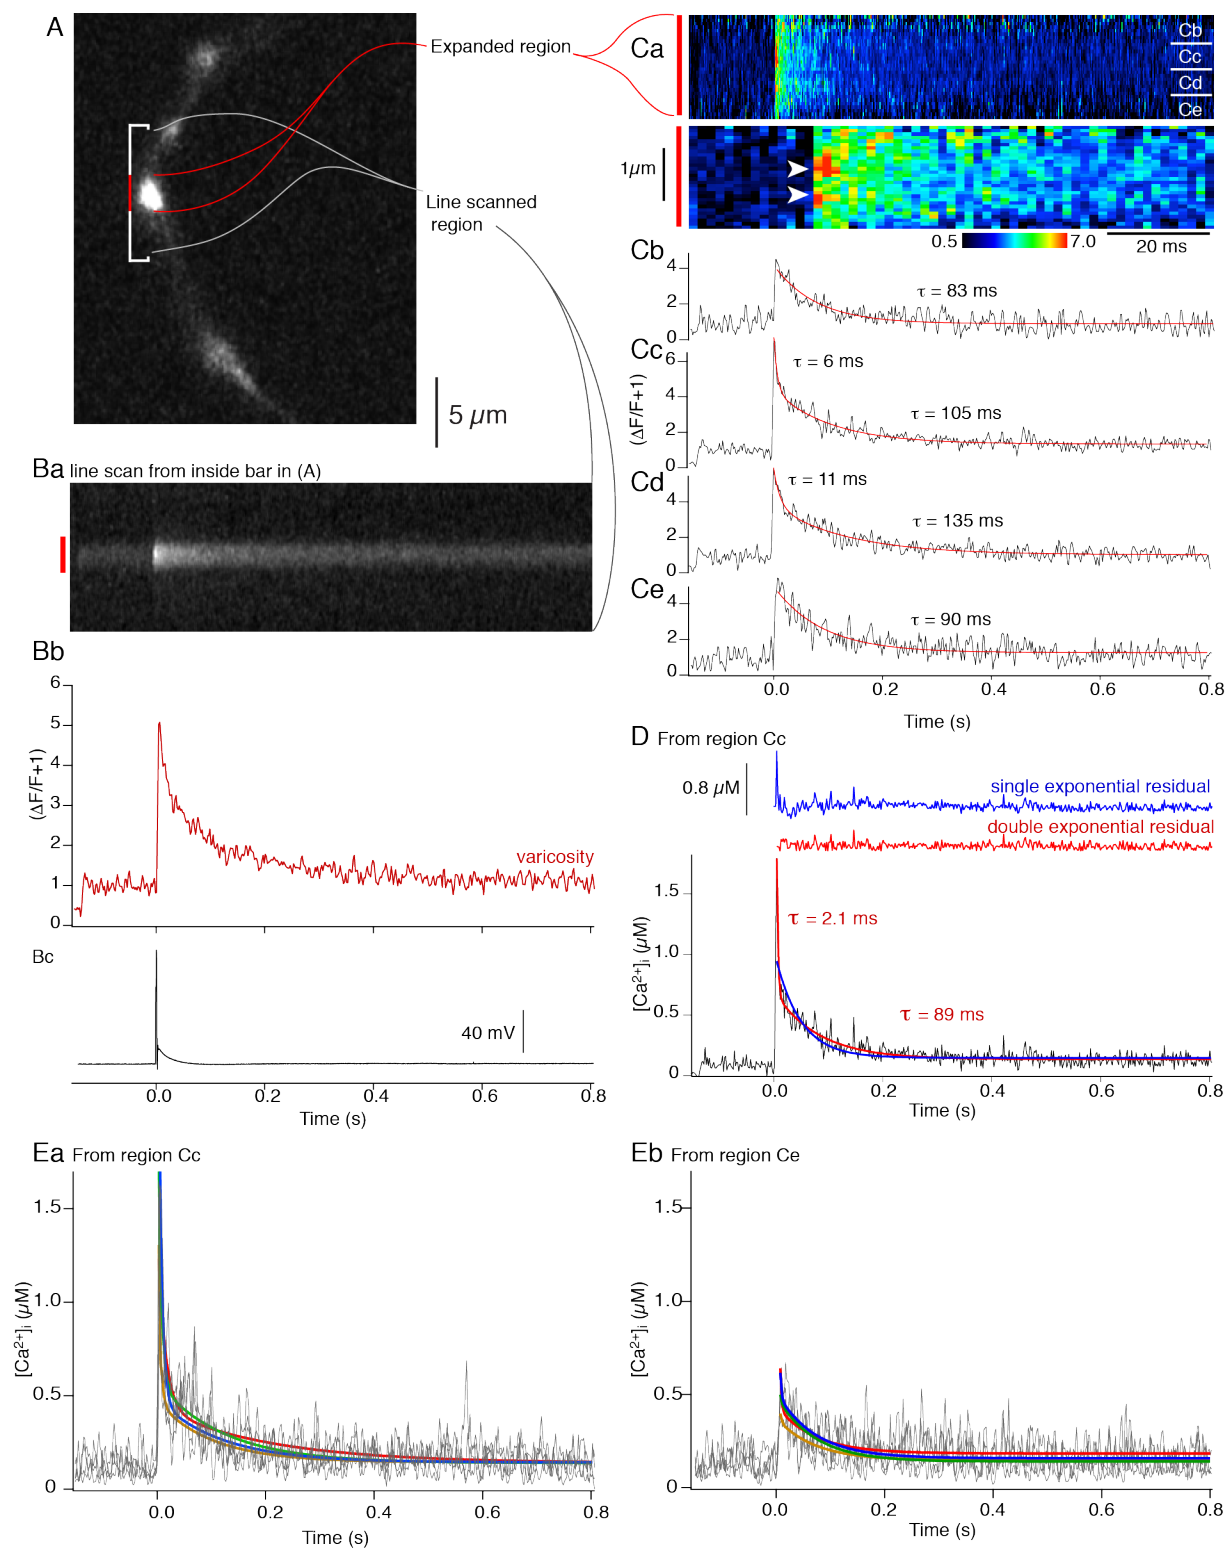



**A)** Axon varicosity containing both Alexa 594 hydrazide and Fluo-5F imaged using the Alexa dye. Bracketed region encompasses a single varicosity (center, red) and axon on either side (white) used for line scanning.

**B)** Mean of 4 line scans from region in **(A)**. The varicosity exhibited a  $\text{Ca}^{2+}$  transient similar to those recorded in earlier figures **(Ba)**. Mean intensity of the linescan through the varicosity **(Bb, red bar)** which showed a large increase in  $\text{Ca}^{2+}$  dye fluorescence following a single action potential **(Bc)**,

**C)** The mean of 4 line-scans within the varicosity (red in **B**) displayed as  $\Delta F/F+1$  **(Ca, upper panel time scale as in graphs in D and E below)**. Immediately after the stimulus there is a rapidly decaying component of the transient. The lower panel of **Ca** shows the two hotspots (arrowheads) at a 10x timescale. Data was then analyzed in quadrants **(Cb-Ce)**. Center quadrants **(Cc and Cd)**. The center quadrants were well fit with double exponentials, the outer with single exponentials.

**D)** Data in **Cc** replotted to demonstrate the amplitude of free  $[\text{Ca}^{2+}]_i$  within this region of the varicosity. As with the data in **Cd**, this required a double exponential fit (single exponential and residual in blue, double exponential and residual in red).

**E)**  $\text{Ca}^{2+}$  transients (grey) were plotted for each of the 4 sequential responses averaged in **(C)**. **(Ea)** plotted from the region labeled **(Cc)** and **(Eb)** from the region labeled **(Ce)** in **(Ca)**. Double exponentials were fit to these data for each of the four traces (colored traces).

Figure 7. Simulations of Fluo-5F transients and clustering of  $\text{Ca}^{2+}$  entry.

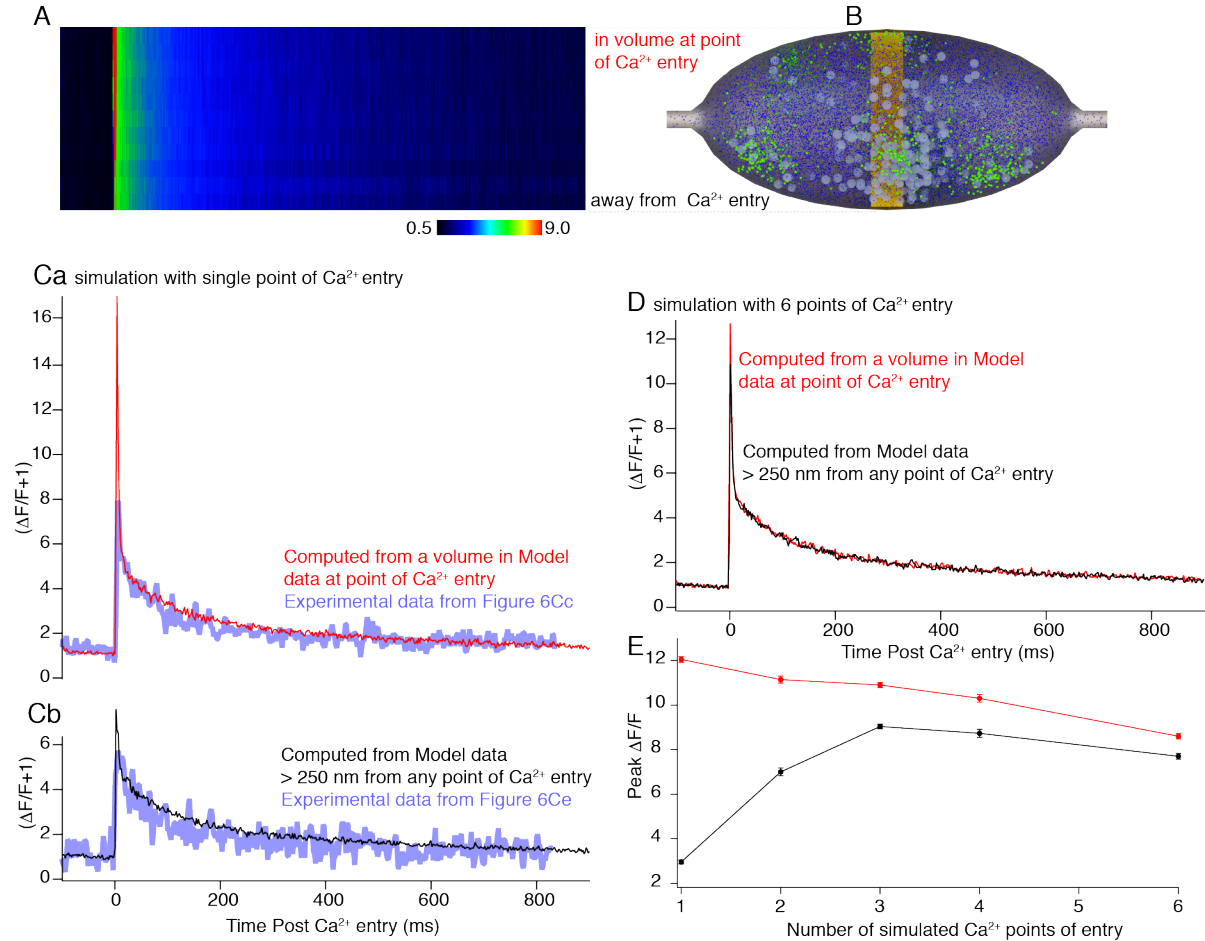

Line scans (**A**) of Fluo-5F transients were simulated by measuring its simulated  $\text{Ca}^{2+}$  binding in a row of volumes (yellow boxes) across the varicosity (**B**).

**C**)  $\text{Ca}^{2+}$  entry was simulated at 1 discrete site placed at the plasmalemma, at the top of the yellow band in (**B**). (**Ca**) Simulated Fluo-5F  $\Delta F/F+1$  transient (red) in the volume closest to the site of  $\text{Ca}^{2+}$  entry (top of yellow band). Experimental data from Fig 7Cc overlaid in blue. (**Cb**) Simulated Fluo-5F  $\Delta F/F+1$  transient in the volume at the bottom of the yellow band in (**B**) opposite the site of  $\text{Ca}^{2+}$  entry (black). Experimental data from Fig 7Ce overlaid in blue.

**D)**  $\text{Ca}^{2+}$  entry was simulated at 6 sites, including one placed at the plasmalemma, at the top of the yellow band in (B). The Fluo-5F transient is shown from this site (red) and away from sites of  $\text{Ca}^{2+}$  entry from the bottom of the yellow band in (B) (black).

**E)** Graph of peak amplitude of a double exponential fit to the simulated transient at a site of  $\text{Ca}^{2+}$  entry (red) and away from these sites (black) in varicosities at which  $\text{Ca}^{2+}$  entry was at 1 to 6 sites.

Figure 8. Paired-pulse potentiation is not explained by presynaptic residual  $\text{Ca}^{2+}$  concentration.

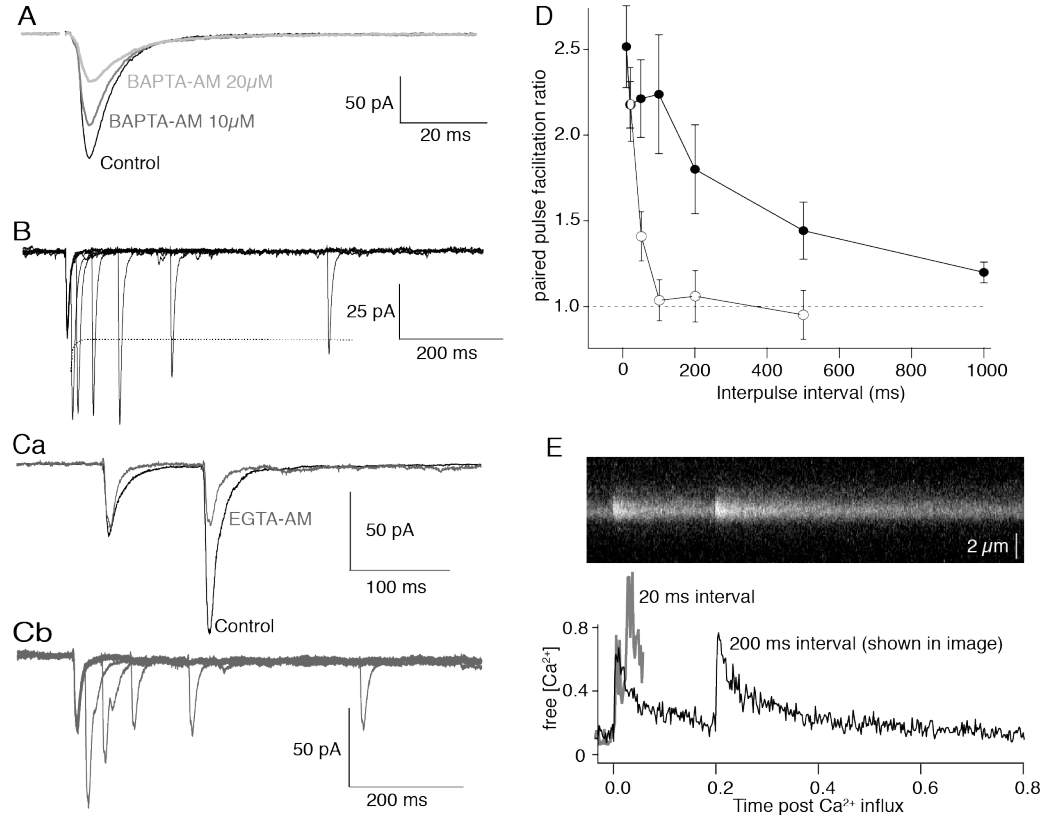

**A)** EPSCs were recorded in subicular pyramidal neurons following stimulation of CA1 pyramidal axons. BAPTA-AM (10 – 20  $\mu\text{M}$ ) was applied to the superfusate for 20 mins leading to substantial dose-dependent inhibition of the evoked EPSC.

**B)** Paired-pulse plasticity in which CA1 axons were stimulated at intervals of 10 ms to 500 ms and the EPSCs recorded in subicular neurons. The dashed line represents simple summation from the first stimulus. All intervals generated potentiation.

**C)** Paired-pulse responses were obtained at 100 ms interstimulus intervals from 5 neurons in which EGTA-AM (10  $\mu\text{M}$ ) was subsequently added to the superfusate (**Ca**, grey). Paired-pulse facilitation was prevented. (**Cb**) In 5 neurons pretreated with EGTA-AM, the interstimulus interval was varied from 20 to 500 ms to demonstrate that the paired pulse potentiation was prevented over intervals greater than 50 ms.

**D)** Control paired-pulse ratios against interstimulus intervals obtained from 7 neurons stimulated as in **(Ab)** (filled circles) and from 5 neurons recorded after EGTA-AM application (open circles).

**E)** Ca<sup>2+</sup> transients were stimulated in paired pulses. Top panel shows line-scan image of stimuli at 200 ms intervals. Bottom panel shows paired-pulse responses at 20 (grey) and 200 (black) ms intervals.

Figure 9. Simulations of  $\text{Ca}^{2+}$  buffering in the varicosity

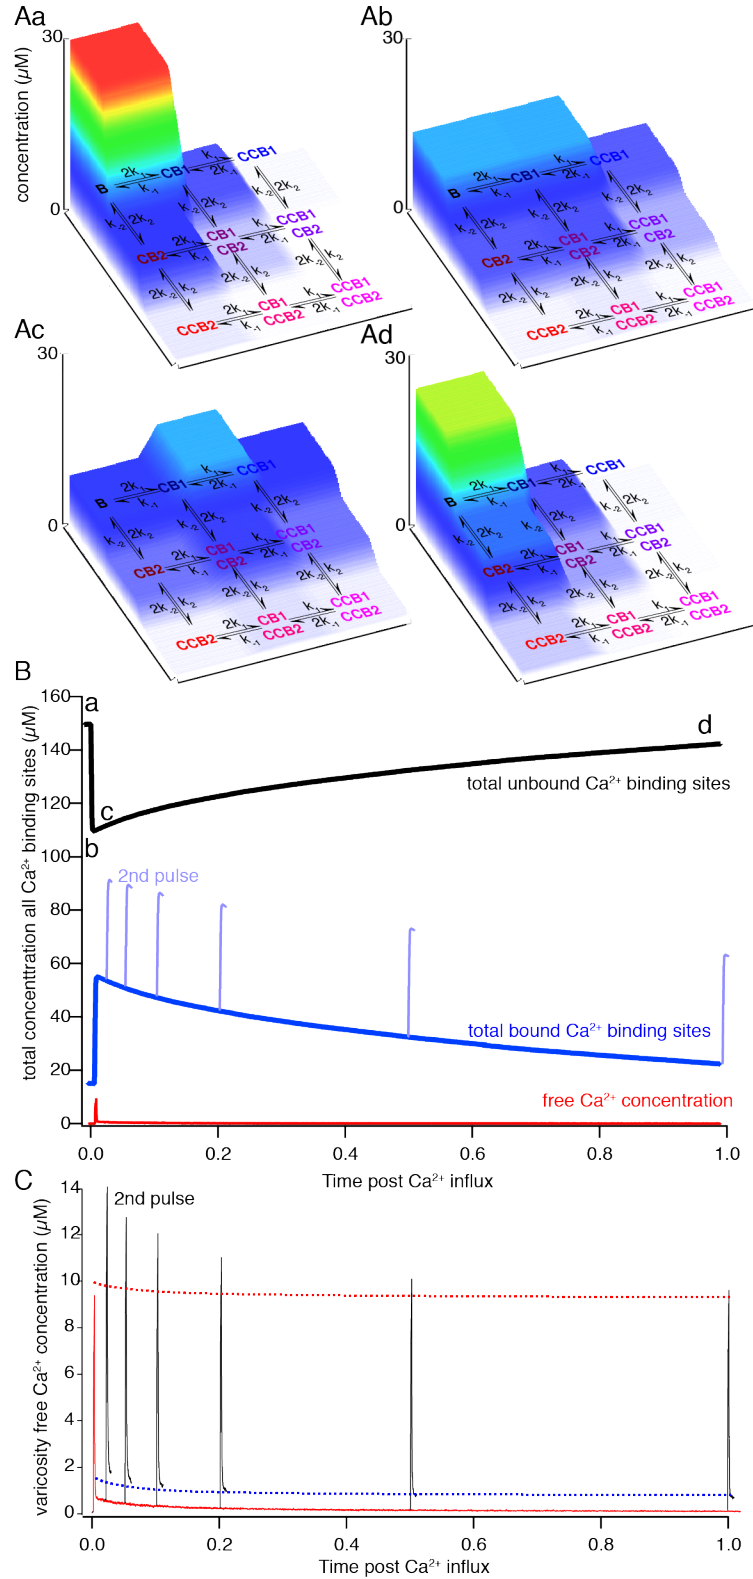

A) Using simulation parameters previously determined, the kinetics of calbindin<sub>28k</sub> binding were simulated and displayed as state diagrams from before a simulated stimulus (Aa) as well as during and after the stimulus (Ab,c and d) from time points indicated in (B). Concentrations of calbindin<sub>28k</sub> in each of its possible Ca<sup>2+</sup>-bound or unbound states throughout the varicosity is plotted on the vertical axis and color coded to concentration. The horizontal axes display Ca<sup>2+</sup> binding to high (B1)- and medium-affinity (B2) sites (C – single Ca<sup>2+</sup> bound, CC – 2 Ca<sup>2+</sup> bound).

**B)** Graph of total concentration of vacant Ca<sup>2+</sup>-binding sites on calbindin<sub>28k</sub> throughout the varicosity (black) and total bound Ca<sup>2+</sup> (blue) after a stimulus and 2<sup>nd</sup> pulse in light blue at varying interpulse intervals. Free Ca<sup>2+</sup> concentration is also shown (red) to the same scale for a single pulse.

**C)** Graph of free Ca<sup>2+</sup> concentration after a single stimulus (black) throughout the varicosity and after 2<sup>nd</sup> stimuli at varying paired-pulse intervals (black). Red dashed line indicates theoretical value of linear summation of a second pulse. Blue dashed line represents the linear sum of the Ca<sup>2+</sup> signal that is resolvable using imaging at 500 Hz.

Figure 11. Paired pulses do not alter nanometer domains of  $\text{Ca}^{2+}$  entry.

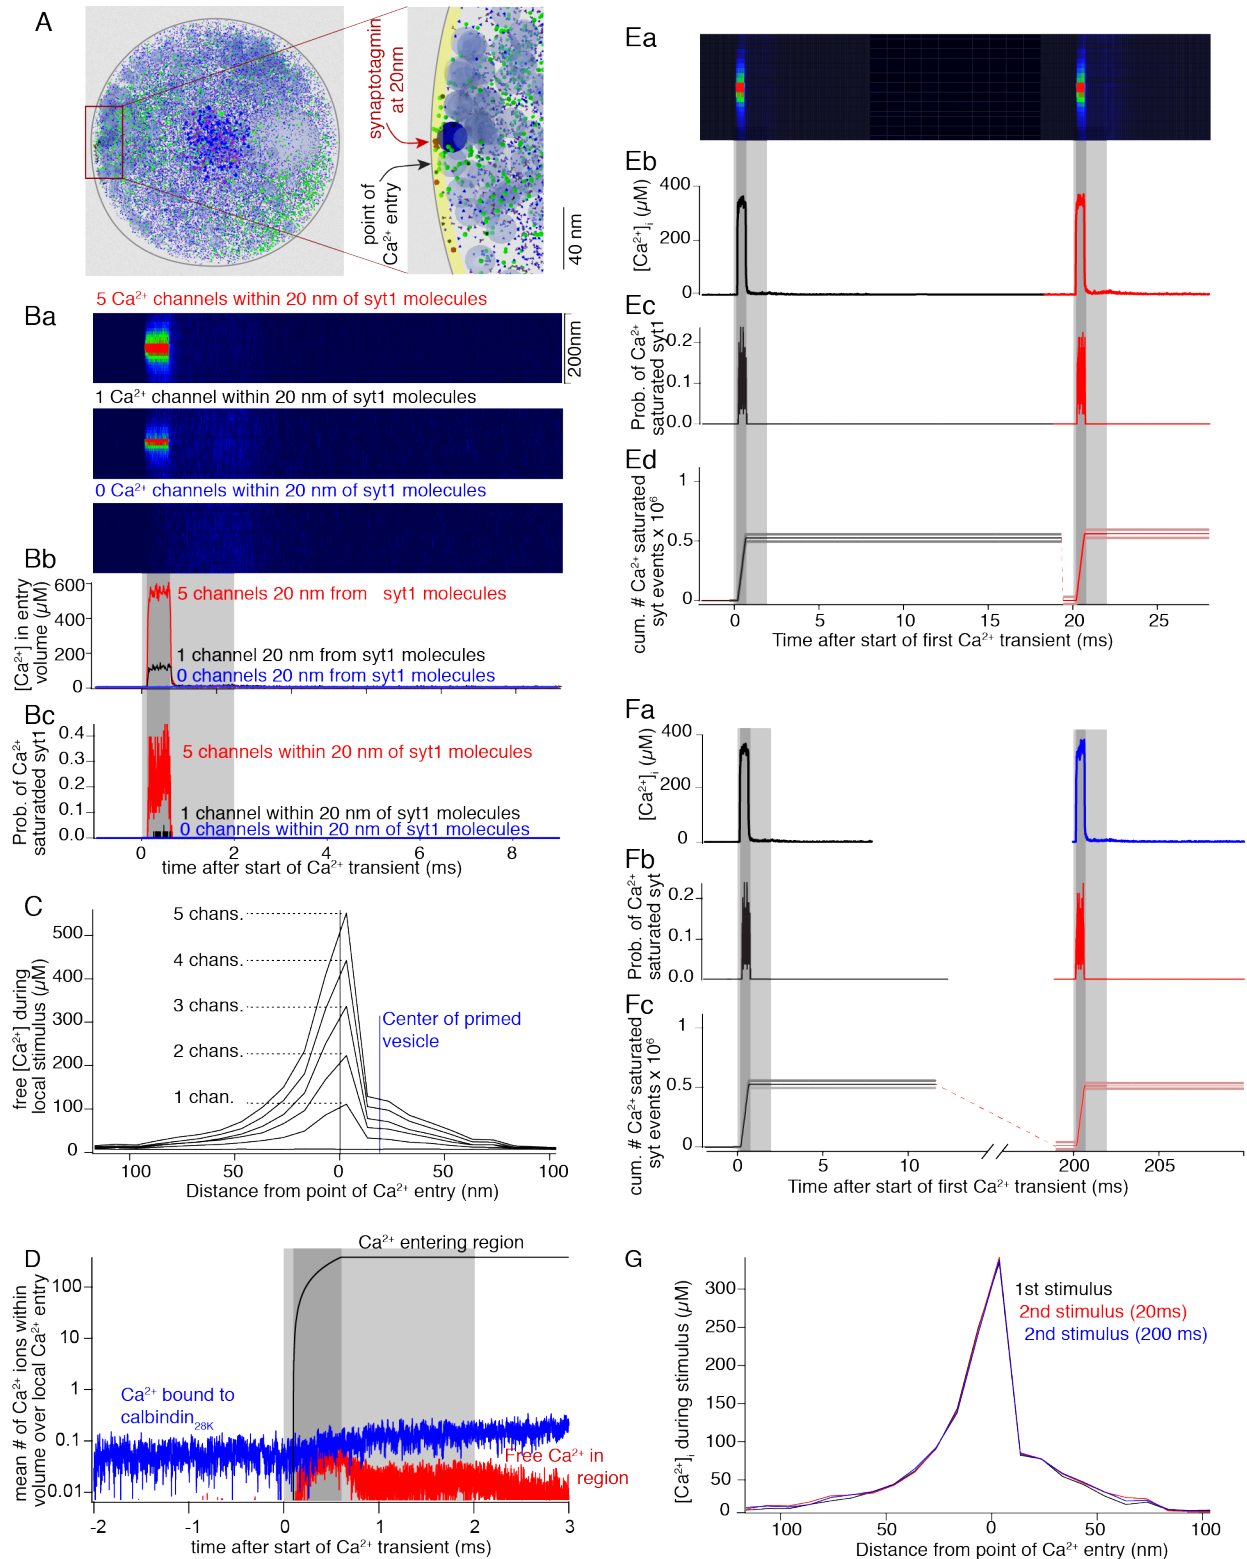



**A)** The characteristics of  $\text{Ca}^{2+}$  entry, buffering, and dispersal were analyzed close to points of  $\text{Ca}^{2+}$  entry modeled within 20 nm of a vesicle along the plasmalemma. Left hand panel shows view along the axon axis including interior contents of the varicosity (small blue dots—calbindin<sub>28k</sub>, green— $\text{Ca}^{2+}$  vesicles, and light blue—intracellular organelle). The right panel is a higher magnification of the region analyzed showing an area adjacent the membrane (yellow band, where simulated  $\text{Ca}^{2+}$  was measured) and vesicles (blue circles, including one dark blue at the site of  $\text{Ca}^{2+}$  entry). It is this vesicle that distorts the spatial symmetry of the  $\text{Ca}^{2+}$  signal in D and G similar to (Shahrezaei and Delaney, 2004).

**Ba)**  $\text{Ca}^{2+}$  transients expressed as a simulated line-scan over time from the yellow band in (A) centered at one point of  $\text{Ca}^{2+}$  entry for the sum of 5 channels (red), 1 channel (black) and 0 channels (blue) active for 0.5 ms (dark grey) against a background of 45  $\mu\text{M}$  entering the entire varicosity for 2 ms (light grey) in **(Bb)** where data is from the center 20 nm of (Ba). **(Bc)** Probability of synaptotagmin 1 model showing occupancy of all five  $\text{Ca}^{2+}$  binding sites for five (red) and one (black) local  $\text{Ca}^{2+}$  channels. Gray shaded regions indicate timing of  $\text{Ca}^{2+}$  entry (dark- at the local point of  $\text{Ca}^{2+}$  entry; light which also encompasses the dark grey period – from 0 to 2 ms of remaining  $\text{Ca}^{2+}$  entering elsewhere in the varicosity).

**C)** Spatial distribution of the peaks of the  $\text{Ca}^{2+}$  transients from the time point at the end of the dark gray shading in (B) for 0 through 5 channels at the local site of  $\text{Ca}^{2+}$  entry.

**D)** Plot of total  $\text{Ca}^{2+}$  entering a  $\text{Ca}^{2+}$  domain within 20 nm of three channels (black), the free  $\text{Ca}^{2+}$  in this region, and the  $\text{Ca}^{2+}$  in the region bound to calcium buffer. The loss of  $\text{Ca}^{2+}$  to diffusion is the difference between the black trace and the sum of the black and red traces (Note that these traces are on a logarithmic scale.) Gray shaded regions as per (B).

**E)** Paired-pulse  $\text{Ca}^{2+}$  transients from the yellow region in (A) simulating three local channels located within 20 nm of synaptotagmin 1. **(Ea)** Simulated line-scans as for (Ba), but with a second pulse simulated 20 ms after the first. **(Eb)**  $\text{Ca}^{2+}$  transients within 20 nm of local  $\text{Ca}^{2+}$  entry repeated at a 20 ms interval. **(Ec)** Probability of synaptotagmin 1 binding five  $\text{Ca}^{2+}$  ions. **(Ed)** Cumulative number of synaptotagmin 1-five  $\text{Ca}^{2+}$ -binding events to emphasize these are equal in both pulses.

**(F)** Paired pulse results **(Fa-Fc)** as per **(Eb-Ed)** but at a paired-pulse interval of 200 ms.

**(G)** Spatial distribution of the peak free(?)  $\text{Ca}^{2+}$  entry in pulse 1 (black) and the second pulse at 20 ms (red) and 200 ms (blue).

## References

- Adler EM, Augustine GJ, Duffy SN, Charlton MP (1991) Alien intracellular calcium chelators attenuate neurotransmitter release at the squid giant synapse. *J Neurosci* 11:1496–1507.
- Allbritton NL, Meyer T, Stryer L (1992) Range of messenger action of calcium ion and inositol 1,4,5-trisphosphate. *Science* 258:1812–1815.
- Anon (n.d.) Calcium Dynamics, Buffering, and Buffer Saturation in the Boutons of Dentate Granule-Cell Axons in the Hilus. Available at: <http://www.jneurosci.org/content/23/5/1612>.
- Arszovszki A, Borhegyi Z, Klausberger T (2014) Three axonal projection routes of individual pyramidal cells in the ventral CA1 hippocampus. *Front Neuroanat* 8:53.
- Augustine GJ, Adler EM, Charlton MP (1991a) The Calcium Signal for Transmitter Secretion from Presynaptic Nerve Terminals - AUGUSTINE - 2006 - *Annals of the New York Academy of Sciences* - Wiley Online Library. *Ann N Y Acad Sci* 635:365–381 Available at: <http://www.ncbi.nlm.nih.gov.proxy.cc.uic.edu/pubmed/1683754>.
- Augustine GJ, Adler EM, Charlton MP (1991b) The calcium signal for transmitter secretion from presynaptic nerve terminals. *Ann N Y Acad Sci* 635:365–381.
- Baimbridge KG, Celio MR, Rogers JH (1992) Calcium-binding proteins in the nervous system. *Trends Neurosci* 15:303–308.
- Bertram R, Sherman A, Stanley EF (1996) Single-domain/bound calcium hypothesis of transmitter release and facilitation. *J Neurophysiol* 75:1919–1931.
- Bleckert A, Photowala H, Alford S (2012) Dual pools of actin at presynaptic terminals. *J Neurophysiol* 107:3479–3492.
- Blundon JA, Wright SN, Brodwick MS, Bittner GD (1993) Residual free calcium is not responsible for facilitation of neurotransmitter release. *Proc Natl Acad Sci USA* 90:9388–9392.
- Brenowitz SD, Regehr WG (2007) Reliability and heterogeneity of calcium signaling at single presynaptic boutons of cerebellar granule cells. *J Neurosci* 27:7888–7898.
- Bucurenciu I, Bischofberger J, Jonas P (2010) A small number of open Ca<sup>2+</sup> channels trigger transmitter release at a central GABAergic synapse. *Nat Neurosci* 13:19–21.
- Bucurenciu I, Kulik A, Schwaller B, Frotscher M, Jonas P (2008) Nanodomain coupling between Ca<sup>2+</sup> channels and Ca<sup>2+</sup> sensors promotes fast and efficient transmitter release at a cortical GABAergic synapse. *Neuron* 57:536–545.
- Chapman ER (2008) How does synaptotagmin trigger neurotransmitter release? *Annu Rev Biochem* 77:615–641.

- Cochilla AJ, Alford S (1998) Metabotropic glutamate receptor-mediated control of neurotransmitter release. *Neuron* 20:1007–1016.
- Davletov BA, Sudhof TC (1993) A single C2 domain from synaptotagmin I is sufficient for high affinity Ca<sup>2+</sup>/phospholipid binding. *The Journal of biological chemistry* 268:26386–26390.
- Delaney KR, Tank DW (1994) A quantitative measurement of the dependence of short-term synaptic enhancement on presynaptic residual calcium. *J Neurosci* 14:5885–5902.
- DiGregorio DA, Vergara JL (1997) Localized detection of action potential-induced presynaptic calcium transients at a *Xenopus* neuromuscular junction. *J Physiol (Lond)* 505 ( Pt 3):585–592.
- Eggermann E, Bucurenciu I, Goswami SP, Jonas P (2012) Nanodomain coupling between Ca<sup>2+</sup> channels and sensors of exocytosis at fast mammalian synapses. *Nat Rev Neurosci* 13:7–21.
- Emptage NJ, Reid CA, Fine A (2001) Calcium stores in hippocampal synaptic boutons mediate short-term plasticity, store-operated Ca<sup>2+</sup> entry, and spontaneous transmitter release. *Neuron* 29:197–208.
- Faas GC, Mody I (2012) Measuring the kinetics of calcium binding proteins with flash photolysis. *Biochim Biophys Acta* 1820:1195–1204.
- Faas GC, Raghavachari S, Lisman JE, Mody I (2011) Calmodulin as a direct detector of Ca<sup>2+</sup> signals. *Nat Neurosci* 14:301–304.
- Finch DM, Nowlin NL, Babb TL (1983) Demonstration of axonal projections of neurons in the rat hippocampus and subiculum by intracellular injection of HRP. *Brain Res* 271:201–216.
- Fioravante D, Regehr WG (2011) Short-term forms of presynaptic plasticity. *Curr Opin Neurobiol* 21:269–274.
- Geppert M, Goda Y, Hammer RE, Li C, Rosahl TW, Stevens CF, Sudhof TC (1994) Synaptotagmin I: a major Ca<sup>2+</sup> sensor for transmitter release at a central synapse. *Cell* 79:717–727.
- Gerachshenko T, Schwartz E, Bleckert A, Photowala H, Seymour A, Alford S (2009) Presynaptic G-protein-coupled receptors dynamically modify vesicle fusion, synaptic cleft glutamate concentrations, and motor behavior. *J Neurosci* 29:10221–10233.
- Hamid E, Wells CA, Zurawski Z, Hamm HE, Alford S (2014) Modulation of neurotransmission by GPCRs is dependent upon the microarchitecture of the primed vesicle complex. *J Neurosci* 34:260–274.
- Harkins AB, Cahill AL, Powers JF, Tischler AS, Fox AP (2004) Deletion of the synaptic protein interaction site of the N-type (CaV2.2) calcium channel inhibits secretion in mouse pheochromocytoma cells. *Proc Natl Acad Sci USA* 101:15219–15224.

- Harris KM, Weinberg RJ (2012) Ultrastructure of synapses in the mammalian brain. *Cold Spring Harb Perspect Biol* 4.
- Haydon PG, Henderson E, Stanley EF (1994) Localization of individual calcium channels at the release face of a presynaptic nerve terminal. *Neuron* 13:1275–1280.
- Hinds HL, Goussakov I, Nakazawa K, Tonegawa S, Bolshakov VY (2003) Essential function of alpha-calcium/calmodulin-dependent protein kinase II in neurotransmitter release at a glutamatergic central synapse. *Proc Natl Acad Sci USA* 100:4275–4280.
- Jackman SL, Turecek J, Belinsky JE, Regehr WG (2016) The calcium sensor synaptotagmin 7 is required for synaptic facilitation. *Nature* 529:88–91.
- Jackson MB, Redman SJ (2003) Calcium dynamics, buffering, and buffer saturation in the boutons of dentate granule-cell axons in the hilus. *J Neurosci* 23:1612–1621.
- Kamiya H, Zucker RS (1994) Residual Ca<sup>2+</sup> and short-term synaptic plasticity. *Nature* 371:603–606.
- Katz B, Miledi R (1967) The timing of calcium action during neuromuscular transmission. *J Physiol (Lond)* 189:535–544.
- Katz B, Miledi R (1968) The role of calcium in neuromuscular facilitation. *J Physiol (Lond)* 195:481–492.
- Keller D, Babai N, Kochubey O, Han Y, Markram H, Schürmann F, Schneggenburger R (2015) An Exclusion Zone for Ca<sup>2+</sup> Channels around Docked Vesicles Explains Release Control by Multiple Channels at a CNS Synapse. *PLoS Comp Biol* 11:e1004253.
- Kerr RA, Bartol TM, Kaminsky B, Dittrich M, Chang J-CJ, Baden SB, Sejnowski TJ, Stiles JR (2008) Fast monte carlo simulation methods for biological reaction-diffusion systems in solution and on surfaces. *SIAM J Sci Comput* 30:3126.
- Khanna R, Li Q, Bewersdorf J, Stanley EF (2007) The presynaptic CaV2.2 channel-transmitter release site core complex. *Eur J Neurosci* 26:547–559.
- Klingauf J, Neher E (1997) Modeling buffered Ca<sup>2+</sup> diffusion near the membrane: implications for secretion in neuroendocrine cells. *Biophys J* 72:674–690.
- Koester HJ, Sakmann B (2000) Calcium dynamics associated with action potentials in single nerve terminals of pyramidal cells in layer 2/3 of the young rat neocortex. *J Physiol (Lond)* 529 Pt 3:625–646.
- Kong CHT, Laver DR, Cannell MB (2013) Extraction of sub-microscopic Ca fluxes from blurred and noisy fluorescent indicator images with a detailed model fitting approach. *PLoS Comp Biol* 9:e1002931.
- Llano I, González J, Caputo C, Lai FA, Blayney LM, Tan YP, Marty A (2000) Presynaptic

- calcium stores underlie large-amplitude miniature IPSCs and spontaneous calcium transients. *Nat Neurosci* 3:1256–1265.
- Llinas R, Gruner JA, Sugimori M, McGuinness TL, Greengard P (1991) Regulation by synapsin I and Ca(2+)-calmodulin-dependent protein kinase II of the transmitter release in squid giant synapse. *J Physiol (Lond)* 436:257–282.
- Llinas R, Sugimori M, Silver RB (1992) Microdomains of high calcium concentration in a presynaptic terminal. *Science* 256:677–679.
- Martens S, Kozlov MM, McMahon HT (2007) How synaptotagmin promotes membrane fusion. *Science* 316:1205–1208.
- Matveev V, Zucker RS, Sherman A (2004) Facilitation through buffer saturation: constraints on endogenous buffering properties. *Biophys J* 86:2691–2709.
- Melzer W, Schneider MF, Simon BJ, Szucs G (1986) Intramembrane charge movement and calcium release in frog skeletal muscle. *J Physiol (Lond)* 373:481–511.
- Mochida S, Sheng ZH, Baker C, Kobayashi H, Catterall WA (1996) Inhibition of neurotransmission by peptides containing the synaptic protein interaction site of N-type Ca<sub>2+</sub> channels. *Neuron* 17:781–788.
- Mochida S, Westenbroek RE, Yokoyama CT, Zhong H, Myers SJ, Scheuer T, Itoh K, Catterall WA (2003) Requirement for the synaptic protein interaction site for reconstitution of synaptic transmission by P/Q-type calcium channels. *Proc Natl Acad Sci USA* 100:2819–2824.
- Mukhamedyarov MA, Grishin SN, Zefirov AL, Palotás A (2009) The mechanisms of multi-component paired-pulse facilitation of neurotransmitter release at the frog neuromuscular junction. *Pflugers Archiv : European journal of physiology* 458:563–570.
- Müller A, Kukley M, Stausberg P, Beck H, Müller W, Dietrich D (2005) Endogenous Ca<sub>2+</sub> buffer concentration and Ca<sub>2+</sub> microdomains in hippocampal neurons. *J Neurosci* 25:558–565.
- Müller M, Felmy F, Schneggenburger R (2008) A limited contribution of Ca<sub>2+</sub> current facilitation to paired-pulse facilitation of transmitter release at the rat calyx of Held. *J Physiol (Lond)* 586:5503–5520.
- Müller M, Felmy F, Schwaller B, Schneggenburger R (2007) Parvalbumin is a mobile presynaptic Ca<sub>2+</sub> buffer in the calyx of held that accelerates the decay of Ca<sub>2+</sub> and short-term facilitation. *J Neurosci* 27:2261–2271.
- Nägerl UV, Novo D, Mody I, Vergara JL (2000) Binding kinetics of calbindin-D(28k) determined by flash photolysis of caged Ca(2+). *Biophys J* 79:3009–3018.
- Neher E (1998) Usefulness and limitations of linear approximations to the understanding of

- Ca<sup>++</sup> signals. *Cell Calcium* 24:345–357.
- Neher E, Augustine GJ (1992) Calcium gradients and buffers in bovine chromaffin cells. *J Physiol (Lond)* 450:273–301.
- Neher E, Sakaba T (2008) Multiple roles of calcium ions in the regulation of neurotransmitter release. *Neuron* 59:861–872.
- Oheim M, Kirchhoff F, Stühmer W (2006) Calcium microdomains in regulated exocytosis. *Cell Calcium* 40:423–439.
- Perin MS, Brose N, Jahn R, Südhof TC (1991) Domain structure of synaptotagmin (p65). *The Journal of biological chemistry* 266:623–629.
- Photowala H, Freed R, Alford S (2005) Location and function of vesicle clusters, active zones and Ca<sup>2+</sup> channels in the lamprey presynaptic terminal. *J Physiol (Lond)* 569:119–135.
- Radhakrishnan A, Stein A, Jahn R, Fasshauer D (2009) The Ca<sup>2+</sup> affinity of synaptotagmin 1 is markedly increased by a specific interaction of its C2B domain with phosphatidylinositol 4,5-bisphosphate. *The Journal of biological chemistry* 284:25749–25760.
- Sabatini BL, Regehr WG (1996) Timing of neurotransmission at fast synapses in the mammalian brain. *Nature* 384:170–172.
- Schmidt H, Arendt O, Eilers J (2012) Diffusion and extrusion shape standing calcium gradients during ongoing parallel fiber activity in dendrites of Purkinje neurons. *Cerebellum* 11:694–705.
- Schmidt H, Schwaller B, Eilers J (2005) Calbindin D28k targets myo-inositol monophosphatase in spines and dendrites of cerebellar Purkinje neurons. *Proc Natl Acad Sci USA* 102:5850–5855.
- Schneggenburger R, Neher E (2000) Intracellular calcium dependence of transmitter release rates at a fast central synapse. *Nature* 406:889–893.
- Scimemi A, Diamond JS (2012) The number and organization of Ca<sup>2+</sup> channels in the active zone shapes neurotransmitter release from Schaffer collateral synapses. *J Neurosci* 32:18157–18176.
- Scott R, Rusakov DA (2006) Main determinants of presynaptic Ca<sup>2+</sup> dynamics at individual mossy fiber-CA3 pyramidal cell synapses. *J Neurosci* 26:7071–7081.
- Scott R, Rusakov DA (2008) Ca<sup>2+</sup> stores and use-dependent facilitation of presynaptic Ca<sup>2+</sup> signaling. *Proc Natl Acad Sci USA* 105:E80–authorreplyE81.
- Shahrezaei V, Cao A, Delaney KR (2006) Ca<sup>2+</sup> from one or two channels controls fusion of a single vesicle at the frog neuromuscular junction. *J Neurosci* 26:13240–13249.

- Shahrezaei V, Delaney KR (2004) Consequences of molecular-level Ca<sup>2+</sup> channel and synaptic vesicle colocalization for the Ca<sup>2+</sup> microdomain and neurotransmitter exocytosis: a monte carlo study. *Biophys J* 87:2352–2364.
- Shahrezaei V, Delaney KR (2005) Brevity of the Ca<sup>2+</sup> microdomain and active zone geometry prevent Ca<sup>2+</sup>-sensor saturation for neurotransmitter release. *J Neurophysiol* 94:1912–1919.
- Stanley EF (1993) Single calcium channels and acetylcholine release at a presynaptic nerve terminal. *Neuron* 11:1007–1011.
- Südhof TC, Rizo J (2011) Synaptic vesicle exocytosis. *Cold Spring Harb Perspect Biol* 3.
- Szabo Z, Obermair GJ, Cooper CB, Zamponi GW, Flucher BE (2006) Role of the synprint site in presynaptic targeting of the calcium channel Ca<sub>v</sub>2.2 in hippocampal neurons. *Eur J Neurosci* 24:709–718.
- Tamamaki N, Nojyo Y (1990) Disposition of the slab-like modules formed by axon branches originating from single CA1 pyramidal neurons in the rat hippocampus. *J Comp Neurol* 291:509–519.
- Thanawala MS, Regehr WG (2013) Presynaptic calcium influx controls neurotransmitter release in part by regulating the effective size of the readily releasable pool. *J Neurosci* 33:4625–4633.
- van den Bogaart G, Meyenberg K, Diederichsen U, Jahn R (2012) Phosphatidylinositol 4,5-bisphosphate increases Ca<sup>2+</sup> affinity of synaptotagmin-1 by 40-fold. *The Journal of biological chemistry* 287:16447–16453.
- Weber AM, Wong FK, Tufford AR, Schlichter LC, Matveev V, Stanley EF (2010) N-type Ca<sup>2+</sup> channels carry the largest current: implications for nanodomains and transmitter release. *Nat Neurosci* 13:1348–1350.
- Yi SS (2013) Time-dependent changes of calbindin D-28K and parvalbumin immunoreactivity in the hippocampus of rats with streptozotocin-induced type 1 diabetes. *J Vet Sci* 14:373–380.
- Yoon E-J, Gerachshenko T, Spiegelberg BD, Alford S, Hamm HE (2007) Gbetagamma interferes with Ca<sup>2+</sup>-dependent binding of synaptotagmin to the soluble N-ethylmaleimide-sensitive factor attachment protein receptor (SNARE) complex. *Mol Pharmacol* 72:1210–1219.
- Zucker RS (1989) Short-term synaptic plasticity. *Annu Rev Neurosci* 12:13–31 Available at: <http://eutils.ncbi.nlm.nih.gov/entrez/eutils/elink.fcgi?dbfrom=pubmed&id=2648947&retmode=ref&cmd=prlinks>.
- Zucker RS, Regehr WG (2002) Short-term synaptic plasticity. *Annu Rev Physiol* 64:355–405.
